## Investigating the Contribution of White Matter Hyperintensities and Cortical Thickness to Empathy in Neurodegenerative and Cerebrovascular Diseases

Miracle Ozzoude<sup>1,2</sup>, Brenda Varriano<sup>1</sup>, Derek Beaton<sup>3</sup>, Joel Ramirez<sup>2,4</sup>, Melissa F. Holmes<sup>2,4</sup>, Christopher J.M. Scott<sup>2,4</sup>, Fuqiang Gao<sup>2,4</sup>, Kelly M. Sunderland<sup>3</sup>, Paula McLaughlin<sup>5,6</sup>, Jennifer Rabin<sup>4,7,8,9</sup>, Maged Goubran<sup>4,8,10</sup>, Donna Kwan<sup>11</sup>, Angela Roberts<sup>12,13</sup>, Robert Bartha<sup>3</sup>, Sean Symons<sup>4,14</sup>, Brian Tan<sup>3</sup>, Richard H. Swartz<sup>7,14</sup>, Agessandro Abrahao<sup>4,7</sup>, Gustavo Saposnik<sup>15,16</sup>, Mario Masellis<sup>7,14</sup>, Anthony E. Lang<sup>7,17</sup>, Connie Marras<sup>7,17</sup>, Lorne Zinman<sup>4,7</sup>, Christen Shoesmith<sup>18</sup>, Michael Borrie<sup>19,20</sup>, Corinne E. Fischer<sup>21</sup>, Andrew Frank<sup>22,23</sup>, Morris Freedman<sup>3,7,24</sup>, Manuel Montero-Odasso<sup>19,25,26</sup>, Sanjeev Kumar<sup>27,28</sup>, Stephen Pasternak<sup>18</sup>, Stephen C. Strother<sup>3,10</sup>, Bruce G. Pollock<sup>27,28</sup>, Tarek K. Rajji<sup>27,28,30</sup>, Dallas Seitz<sup>31</sup>, David F. Tang-Wai<sup>7,32</sup>, Marvin Chum<sup>33,34</sup>, John Turnbull<sup>33,34</sup>, Dar Dowlathshahi<sup>22</sup>, Ayman Hassan<sup>35</sup>, Leanne Casaubon<sup>7</sup>, Jennifer Mandzia<sup>18,19</sup>, Demetrios Sahlas<sup>33,34</sup>, David P. Breen<sup>36,37,38</sup>, David Grimes<sup>22</sup>, Mandar Jog<sup>18,19,39</sup>, Thomas D.L. Steeves<sup>15</sup>, Stephen R. Arnott<sup>3</sup>, Sandra E. Black<sup>2,4,7,30,40</sup>, Elizabeth Finger<sup>18,19</sup>, on behalf of ONDRI Investigators, and Maria Carmela Tartaglia<sup>1,7,32</sup>

### Affiliations:

<sup>1</sup>Tanz Centre for Research in Neurodegenerative Diseases, University of Toronto, Toronto, ON, Canada

<sup>2</sup>L.C. Campbell Cognitive Neurology Unit, Sunnybrook Health Sciences Centre, Toronto, ON, Canada

<sup>3</sup>Rotman Research Institute of Baycrest Centre, Toronto, ON, Canada

<sup>4</sup>Hurvitz Brain Sciences Research Program, Sunnybrook Research Institute, Toronto, ON, Canada

<sup>5</sup>Nova Scotia Health and Dalhousie University, Halifax, NS, Canada

<sup>6</sup>Centre for Neuroscience Studies, Queen's University, Kingston, ON, Canada

<sup>7</sup>Department of Medicine, Division of Neurology, University of Toronto, Toronto, ON, Canada

<sup>8</sup>Harquail Centre for Neuromodulation, Hurvitz Brain Sciences Program, Sunnybrook Health Sciences Centre, Toronto, ON, Canada

<sup>9</sup>Rehabilitation Sciences Institute, University of Toronto, Toronto, ON, Canada

<sup>10</sup>Department of Medical Biophysics, University of Toronto, ON, Canada

<sup>11</sup>Queen's University, Kingston, ON, Canada

<sup>12</sup>Roxelyn and Richard Pepper Department of Communication Sciences and Disorders, Northwestern University, Evanston, Illinois, USA

<sup>13</sup>School of Communication Sciences and Disorders, Faculty of Health Sciences, Western University, London, ON, Canada

<sup>14</sup>Sunnybrook Research Institute, Sunnybrook Health Sciences Centre, Toronto, Ontario, Canada

<sup>15</sup>Division of Neurology, Department of Medicine, St. Michael's Hospital, University of Toronto, ON, Canada

<sup>16</sup>Li Ka Shing Knowledge Institute, St. Michael's Hospital, University of Toronto, ON, Canada

<sup>17</sup>Edmond J Safra Program for Parkinson Disease, Movement Disorder Clinic, Toronto Western Hospital, University Health Network, Toronto, ON, Canada

<sup>18</sup>Department of Clinical Neurological Sciences, Western University, London, ON, Canada

<sup>19</sup>Schulich School of Medicine and Dentistry, Western University, London, Ontario, Canada

<sup>20</sup>St. Joseph's Healthcare Centre, London, Ontario, Canada

<sup>21</sup>Keenan Research Centre for Biomedical Science, St. Michael's Hospital, Toronto, Canada

<sup>22</sup>Department of Medicine (Neurology), University of Ottawa Brain and Mind Research Institute and Ottawa Hospital Research Institute, Ottawa, ON, Canada

<sup>23</sup>Brüyère Research Institute, Ottawa, Ontario, Canada

<sup>24</sup>Division of Neurology, Baycrest Health Sciences, Toronto, Ontario, Canada

<sup>25</sup>Lawson Health Research Institute, London, Ontario, Canada

<sup>26</sup>Gait and Brain Lab, Parkwood Institute, London, Ontario, Canada

<sup>27</sup>Department of Psychiatry, University of Toronto, Toronto, ON, Canada

<sup>28</sup>Adult Neurodevelopment and Geriatric Psychiatry, Centre for Addiction and Mental Health, Toronto, ON, Canada

<sup>29</sup>Toronto Dementia Research Alliance, University of Toronto, Toronto, ON, Canada

<sup>30</sup>Cumming School of Medicine, University of Calgary, Calgary, Alberta, Canada

<sup>31</sup>Memory Clinic, Toronto Western Hospital, University Health Network, Toronto, ON, Canada

<sup>32</sup>Faculty of Health Sciences, McMaster University, Hamilton, ON, Canada

<sup>33</sup>Department of Medicine, McMaster University, Hamilton, Ontario, Canada

<sup>34</sup>Thunder Bay Regional Health Research Institute, Thunder Bay, Ontario, Canada

<sup>35</sup>Centre for Clinical Brain Sciences, University of Edinburgh, Edinburgh, UK

<sup>36</sup>Anne Rowling Regenerative Neurology Clinic, University of Edinburgh, UK

<sup>37</sup>Usher Institute of Population Health Sciences and Informatics, University of Edinburgh, UK

<sup>38</sup>London Health Sciences Centre, London, Ontario, Canada

<sup>39</sup>Heart & Stroke Foundation Canadian Partnership for Stroke Recovery, Sunnybrook Health Sciences Centre, Toronto, ON, Canada

**Correspondence to:**

Dr. Maria Carmela Tartaglia MD, FRCPC  
Marion and Gerald Soloway Chair in Brain Injury and Concussion Research  
Associate Professor, Tanz Centre for Research in Neurodegenerative Diseases, University of Toronto  
Krembil Discovery Tower, 60 Leonard Avenue,  
6th floor 6KD-407, Toronto, ON M5T 0S8, Canada.  
Tel: 416 603 5483; Fax: 416 603 5768  
Email: [carmela.tartaglia@uhn.ca](mailto:carmela.tartaglia@uhn.ca)

Characters in the title: 149 (with spaces)

Abstract Words: 203

Manuscript Words: 5, 002

Tables & Figures: 6 tables & 4 figures

Number of References: 106

**Short title: Association between WMH, Atrophy, and Empathy in Neurocognitive Disorders**

Keywords: white matter hyperintensities, cortical thickness, social cognition, empathy, neurodegenerative disease, cerebrovascular disease

**List of abbreviations:**

AD = Alzheimer's Disease  
ALS = Amyotrophic Lateral Sclerosis  
bvFTD = behavioural variant Frontotemporal Dementia  
CVD = Cerebrovascular Disease  
CBS = Corticobasal Syndrome  
CT = Computed Tomography  
dWMH = Deep White Matter Hyperintensities  
dx = diagnostic  
EC = Emotional Concern  
FTD = Frontotemporal Dementia  
IRI = Interpersonal Reactivity Index  
MCI = Mild Cognitive Impairment  
MRI = Magnetic Resonance Imaging  
MoCA = Montreal Cognitive Assessment  
MSE = Mean Square Error  
nfvPPA = non-fluent Primary Progressive Aphasia  
ONDRI = Ontario Neurodegenerative Disease Research Initiative  
OFC = Orbitofrontal Cortex  
PeD = Personal Distress  
PLSc = Partial Least Square Correlation  
PT = Perspective Taking  
PD = Parkinson's Disease  
PSP = Progressive Supranuclear Palsy  
pWMH = Periventricular White Matter Hyperintensities

svPPA = semantic variant Primary Progressive Aphasia

ST-TIV = Supratentorial Total Intracranial Volume

SVD = Small Vessel Disease

WMH = White Matter Hyperintensities

## **Abstract**

**Introduction:** Change in empathy is an increasingly recognised symptom of neurodegenerative diseases and contributes to caregiver burden and patient distress. Empathy impairment has been associated with brain atrophy but its relationship to white matter hyperintensities (WMH) is unknown. We aimed to investigate the relationships amongst WMH, brain atrophy, and empathy deficits in neurodegenerative and cerebrovascular diseases.

**Methods:** 513 participants with Alzheimer’s Disease/Mild Cognitive Impairment, Amyotrophic Lateral Sclerosis, Frontotemporal Dementia (FTD), Parkinson’s Disease, or Cerebrovascular Disease (CVD) were included. Empathy was assessed using the Interpersonal Reactivity Index. WMH were measured using a semi-automatic segmentation and FreeSurfer was used to measure cortical thickness.

**Results:** A heterogeneous pattern of cortical thinning was found between groups, with FTD showing thinning in frontotemporal regions and CVD in left superior parietal, left insula, and left postcentral. Results from both univariate and multivariate analyses revealed that several variables were associated with empathy, particularly cortical thickness in the fronto-insulo-temporal and cingulate regions, sex(female), global cognition, and right parietal and occipital WMH.

**Conclusions:** Our results suggest that cortical atrophy and WMH may be associated with empathy deficits in neurodegenerative and cerebrovascular diseases. Future work should consider investigating the longitudinal effects of WMH and atrophy on empathy deficits in neurodegenerative and cerebrovascular diseases.

## 1. Introduction

Empathy deficit is defined as the inability to perceive the emotional state of another (cognitive empathy) or feel warmth, concern, and compassion for others (emotional empathy) [1,2]. Empathy deficit is increasingly recognised as a common symptom in several neurodegenerative diseases [3–5], although it is more prominent in frontotemporal lobar degeneration [6,7], and is an early sign of behavioural variant frontotemporal dementia (bvFTD) [8]. There is growing evidence that having an empathy deficit negatively impacts patient and caregiver quality of life independent of cognitive and physical symptoms [9–12]. Since empathy deficits may reflect the progression of these diseases [3,4], understanding the neuroanatomical and pathophysiology correlates of empathy deficits in neurodegeneration is of critical importance.

Brain atrophy is associated with empathy deficits. Rankin et al. [7] found that lower scores on an empathy measure were associated with atrophy of the right fronto-temporal, right anterior fusiform, and right caudate regions in patients with various neurodegenerative diseases. Likewise, Eslinger et al. [6] reported that cortico-subcortical atrophy involving frontal, anterior temporal regions, amygdala, and caudate was associated with impaired cognitive empathy, whilst atrophy of right medial prefrontal cortex was associated with impaired emotional empathy in bvFTD. Furthermore, Dermody et al. [13] reported deficits in cognitive empathy in Alzheimer’s disease (AD) compared to controls, which correlated with GM atrophy in the left temporoparietal regions. Although Parkinson’s disease (PD) is primarily known for its motor deficits, empathy and emotion recognition deficits have been reported in persons with PD when compared to healthy controls [5,14–17]. These deficits are likely due to disruptions to the fronto-striatal circuitry [18]. Additionally, studies also reported an association between orbitofrontal cortex and amygdala atrophy and emotion recognition deficits in PD patients [19,20]. In amyotrophic lateral sclerosis

(ALS), atrophy of anterior cingulate, right inferior frontal, and insular cortices were associated with lower levels of emotional empathy [21]. Given that the clinical presentations of cerebrovascular disease (CVD) depends on the size and location of the cerebrovascular insults, stroke-related brain atrophy in the right temporal pole and right anterior insula were associated with impaired emotional empathy [22].

Aside from atrophy, white matter hyperintensities (WMH) of presumed vascular origin are commonly associated with ageing, small vessel disease (SVD), and vascular risk factors [23–26]. WMH are associated with cognitive and behavioural impairments in neurodegenerative and cerebrovascular diseases [27–32]. The impact of WMH on empathy is unknown. Given (1) the association of atrophy to empathy deficits in neurodegenerative diseases [6,7] and (2) the limited research on the association of WMH to empathy deficits, the aim of the present study was to determine the contribution of WMH burden and cortical atrophy to cognitive and emotional empathy changes in participants with neurodegenerative and cerebrovascular diseases. We investigated empathy deficits in these participants using self-report and study partner ratings on Interpersonal Reactivity Index (IRI) [1]. We hypothesised that both lobar WMH burden and focal cortical atrophy are associated with alteration of cognitive and emotional empathy in these participants.

## **2. Methods and Materials**

### *2.1. Participants and study design*

Study participants were enrolled as part of Ontario Neurodegenerative Disease Research Initiative (ONDRI), a multi-centre, longitudinal observational study conducted in Ontario, Canada.

Detailed inclusion and exclusion criteria for each diagnostic cohort (dx) are reported elsewhere [33,34]. Briefly, AD/MCI participants met National Institute on Aging Alzheimer’s Association criteria for probable or possible AD, or MCI [35,36]; ALS participants met El Escorial World Federation of Neurology diagnostic criteria for possible, probable or definite familial or sporadic ALS [37]; the latest criteria were used for possible or probable bvFTD [38], for agrammatic/non-fluent and semantic variants of primary progressive aphasia (nfvPPA and svPPA) [39] and progressive supranuclear palsy (PSP) [40]; Corticobasal syndrome diagnosis made according to latest criteria [41]; PD participants met criteria for idiopathic PD defined by the United Kingdom’s Parkinson’s Disease Society Brain Bank clinical diagnostic criteria [42]; and Cerebrovascular disease (CVD) participants had experienced a mild or moderate ischemic stroke event (documented on MRI or CT) three or more months prior to enrolment in compliance with the National Institute of Neurological Disorders and Stroke-Canadian Stroke Network vascular cognitive impairment harmonization standards [43]. Participants were required to have a study partner who met the following inclusion criteria: (1) interact with the participants frequently (at least once a month), (2) know the participant well enough to answer questions about her/his cognitive abilities, communication skills, mood, and daily functioning, and (3) provide written informed consent and complete study questionnaires. The study was approved by each participating institution’s Research Ethics Board and performed in accordance with the Declaration of Helsinki. All participants and study partners provided written informed consent, and subsequently underwent clinical evaluation and MRI, in addition to the other assessments as part of the full ONDRI protocol described elsewhere [33].

## *2.2. Measures*

### *2.2.1. Empathy Assessment*

Empathy was assessed using the IRI [1]. IRI is a self-report and partner-report questionnaire on which lower scores reflect more impaired empathy. The self-report version consists of four subscales with 28 questions to measure both cognitive (Perspective Taking (PT) and Fantasy) and emotional (Empathic Concern (EC) and Personal distress (PeD)) aspects of empathy, whilst the partner-report version consists of 14 questions to measure PT and EC. The PT subscale assesses the ability to take on another's perspective. The Fantasy subscale is the tendency to empathise for a fictional character. The EC subscale assesses the ability to feel concern for another's distress, whereas the PeD subscale measures the participant's overall anxiety and personalised emotional reactivity. Given that lack of insight can occur in neurodegenerative diseases, this questionnaire has also been validated for use with study partners. Thus, in the ONDRI protocol, it was administered to both the participant and their study partner to generate two scores for each domain [44], i.e. PT: participant = IRIsself-PT; study partner = IRIothers-PT. EC: participant = IRIsself-EC; study partner = IRIothers-EC. Within the scope of this paper, we analysed only the PT and EC scales because of the construct and criterion validity issues with the fantasy subscale and predictive validity issue with the PeD subscale [7].

### *2.2.2. Functional and Global Cognitive Assessments*

All participants were evaluated using the Montreal Cognitive Assessment (MoCA) for global cognitive function [45]. Study partners provided ratings of dependency in activities of daily living using the Instrumental Activity of Daily Living (iADLs) and Activity of Daily Living (ADLs) scales [46].

### *2.3. MRI Acquisition*



MRI scans were acquired using 3 Tesla MRI systems. Detailed MRI protocols are published in our prior work [47,48] and harmonised with the Canadian Dementia Imaging Protocol [49]. In brief, the structural MRI sequences used in this analysis of ONDRI data included: high-resolution three-dimensional T1-weighted, interleaved proton density, T2-weighted, and T2 fluid-attenuated inversion recovery.

## *2.4. Image Processing*

### *2.4.1. White Matter Hyperintensity Estimation*

A detailed description of the ONDRI structural processing pipeline methods has been published elsewhere [48]. Briefly, ONDRI's neuroimaging platform used previously published and validated methods [50–56] and outputs were further subjected to comprehensive anomaly detection to ensure high quality for data release from ONDRI's neuroinformatics platform [57]. The final output of the neuroimaging pipeline produced a skull-stripped brain mask with segmented voxels comprising of normal appearing white matter, normal appearing grey matter, ventricular and sulcal cerebrospinal fluid, deep and periventricular lacunes, perivascular spaces (PVS), cortico-subcortical stroke lesion, periventricular WMH (pWMH), and deep WMH (dWMH). The 10 tissue classes were further combined with ONDRI's 28 regional parcellation to create 280 distinct brain regions [48].

For this study, we combined both pWMH and dWMH volumes. This was derived by extracting brain parcellations that intersected with WMH segmentation and adding them to create 5 lobar WMH volumes: frontal, parietal, temporal, occipital and basal ganglia/thalamus (BGT). Each lobar WMH volume was corrected using supratentorial total intracranial volume (ST-TIV) and log transformed + small constant to achieve normal distribution.

#### 2.4.2. Cortical Thickness Estimation

All scans were processed using FreeSurfer (Linux FSv6.0). Details of FreeSurfer pipeline have been previously described [58,59]. Briefly, the standard reconstruction steps included skull stripping, white matter segmentation, intensity normalisation, surface reconstruction, subcortical segmentation, cortical parcellation and thickness. A modified FreeSurfer pipeline was used that incorporated ONDRI's skull stripped and lesion masks to decrease overall failure rates in participants with significant atrophy and SVD [60].

Cortical thickness was calculated as the distance between the grey matter and white matter boundaries (white matter surface) to grey matter and cerebrospinal fluid boundaries (pial surface) on the cortex in each hemisphere. Each participant's cortex was anatomically parcellated and each sulcus and gyrus was labelled and resampled to FS's average surface map (fsaverage). A 10-mm full-width half-maximum Gaussian spatial smoothing kernel was applied to the surface maps.

#### 2.5. Statistical Analysis

Statistical analyses were conducted using R (v 3.4.1), and boxplot figure generated using ggplot2 package [61]. One-way analysis of variance with Bonferroni *post hoc* correction was used to determine group differences on age, education, MoCA score, ADLs, iADLs, and empathy (IRIother-EC, IRIother-PT, IRIsself-EC, IRIsself-PT). Chi-square test was performed to look for differences in sex and history of vascular risk factors (hypertension, diabetes, high cholesterol, and smoking). Group differences on ST-TIV adjusted log transformed lobar WMH volumes was analysed using one-way multivariate analysis of covariance, adjusting for age.

A whole brain vertex-wise general linear model built-in FreeSurfer was used to assess group differences on cortical thickness, adjusting for age. Monte Carlo simulations with 5000 iterations using a cluster-wise threshold of 2 ( $p = 0.01$ ) with cluster-wise  $p < 0.05$  were used for

multiple comparisons correction. Bonferroni was applied across both hemispheres. We extracted the 68 regional cortical thickness from the Desikan-Killiany atlas provided in FreeSurfer [62] for further analyses.

In order to examine the relationships between empathy, lobar WMH volumes, and regional cortical thickness, we used two approaches to more fully understand our data: (1) a univariate approach with elastic net (LASSO + ridge penalised regression) [63,64], and (2) a multivariate approach with partial least squares correlation (PLSc) [65–67]. Each procedure provides different perspectives: elastic net is a penalised (ridge) and sparse (LASSO) procedure that pushes coefficients to zero, and helps indicate the best subset of explanatory variables for a response variable, and PLSc is a multivariate approach akin to the PCA between two sets of variables; we used PLSc to model the joint relationship between empathy (all four IRI subscale scores) and the remaining variables (age, sex, MoCA, lobar WMH volumes, and regional cortical thickness).

We performed four elastic net analyses—one for each empathy score. For each elastic net, our model was  $\text{IRI subscale score} \sim \text{Age} + \text{Sex} + \text{MoCA} + 10 \text{ lobar WMH} + 68 \text{ regional cortical thickness}$ . Age, sex, and MoCA were included because they are implicated in empathy and emotion [7,61]. For the elastic net procedure, we set  $\alpha = 1$  (LASSO) and used glmnet's internal cross-validation to search over the lambda parameter (ridge); our search grid for lambda parameters included 300 values from the range of 0.001-1000. We performed a repeated train-test procedure with elastic net: (1) 75% of the data was used for glmnet's internal cross-validation to identify the lambda parameter with k-folds where  $k = 10$  and then (2) the remaining 25% of the data were used to test the model and record the lambda value with the mean square error (MSE). These two steps were repeated 500 times to build a consensus of variables that produced the lowest MSE from the test step; our procedure effectively was a repeated version of that found in [68]. For each of the

500 repeats we recorded the lambda value with the lowest MSE and the corresponding MSE. We then identified all models (from the 500) where a lambda value had the lowest MSE at least approximately 5% of the time. That is, the models corresponding to lambda values that occurred approximately 25 out of 500 times were kept, and those variables retained. We used this approach to provide a consensus of variables/models that were selected. For the elastic net and repeated train-test procedure, we maintained the dx x sex distribution of the full sample for the repeated splits.

We performed one PLSc where one set of variables were the 4 IRI subscale scores and the other set of variables was age + sex + MoCA + 10 lobar WMH + 68 regional cortical thickness. For PLSc, we used two resampling procedures: (1) permutation resampling [69] to help identify which components to interpret [67,70], and (2) bootstrap resampling to identify which variables were stable contributors to components [71], through a statistic called the bootstrap ratio [67,72]. We performed this procedure 2,500 times. Like the elastic net procedure, we maintained the dx x sex distribution of the full sample for the resampling.

### **3. Results**

#### *3.1. Participant and study partner characteristics*

A total of 513 participants (AD/MCI (N = 126), ALS (N = 40), FTD (N = 52), PD (N = 140), and CVD (N = 155)) with available baseline MRIs were used for this analysis. In the FTD group, 21(40.4%) were diagnosed with bvFTD, 8(15.4%) were diagnosed with nvPPA, 4(7.7%) were diagnosed with svPPA, 16(30.8%) were diagnosed with PSP-Richardson syndrome, and 3(5.8%) were diagnosed with CBS. These were diagnoses at baseline for the purpose of study recruitment into a cohort. Participants' demographic and clinical characteristics are displayed in

Table 1. All groups differed in terms of age, education, sex, MoCA, ADLs, iADLs, hypertension, and high cholesterol.

For study partners, 74.3% were domestic partners, 75% were female, and 81% lived with the participant. Overall, the average age across groups was 62.1 years and average hours spent per week with participants was 138.9 hrs (Table 2).

### 3.2. Empathy rating across dx groups

Participant and study partner ratings of empathy were lowest in the FTD group (Table 1; Figure 1). Comparing participant and study partner ratings of EC did not reveal any difference within AD/MCI ( $t_{103} = 0.03$ ,  $p = 0.974$ ), ALS ( $t_{33} = -0.44$ ,  $p = 0.663$ ), PD ( $t_{128} = 0.61$ ,  $p = 0.540$ ), and CVD ( $t_{127} = -0.48$ ,  $p = 0.632$ ). However, there was a significant difference between participant and study partner ratings of EC within FTD ( $t_{43} = -2.38$ ,  $p = 0.022$ ) with ratings showing higher participant and lower study partner EC scores. There were significant differences between participant and study partner ratings of PT within AD/MCI ( $t_{109} = -5.09$ ,  $p < 0.001$ ), FTD ( $t_{46} = -5.56$ ,  $p < 0.001$ ), PD ( $t_{128} = -4.57$ ,  $p < 0.001$ ), and CVD ( $t_{143} = -4.33$ ,  $p < 0.001$ ), with ratings showing higher participant and lower study partner PT scores.

### 3.3. Participant Sex differences on Empathy rating

After adjusting for study partner age and sex, females showed significantly higher scores than males on IRIother-EC, IRIsself-EC, and IRIsself-PT (Table 3).

### 3.4. Lobar WMH Volumes and Regional Cortical thickness across dx groups

Bonferroni *post hoc* correction showed that there were significant differences between the five diagnostic groups on four lobar WMH volumes adjusting for age, with the CVD group showing the highest lobar WMH volumes (Table 1).

Cortical thickness at group level, adjusting for age and after correcting for multiple comparisons, revealed lower cortical thickness in the left superior parietal cortex in participants with CVD compared to participants with ALS (Table 4) (Figure 2A). Cortical thickness in the left insula and left postcentral cortices was lower in participants with CVD compared to PD (Figure 2B). FTD participants had significantly lower cortical thickness in many areas compared to other groups: the bilateral lateral orbitofrontal (OFC), left pars-opercularis, and right superior temporal cortices compared to AD/MCI (Figure 2C); left lateral OFC, left pars-opercularis, and right middle temporal cortices compared to participants with ALS (Figure 2D); bilateral inferior temporal, right superior temporal, right superior frontal, left pars-opercularis, and bilateral lateral OFC cortices compared to PD (Figure 2E); and right inferior temporal and left lateral OFC cortices compared to participants with CVD (Figure 2F).

### *3.5. Lobar WMH Volumes and Regional Cortical thickness and their relationship to Empathy*

We used all complete case data for both the elastic net and PLSc analyses. These data included N = 429 individuals across the five dx. See Table 5A for distribution of males and females per dx. For these 429 individuals the mean age = 68.42, median age = 68.78, min/max age = 40.12/87, where the mean MoCA = 24.44, median MoCA = 25, min/max MoCA = 13/30.

#### *3.5.1 Elastic net models*

The IRIOther-PT model produced six lambda values that occurred approximately greater than or equal to 5% of all resamples (i.e.,  $> \sim 25/500$ ). Table 5B shows the results for the IRIOther-PT models. Note that one large lambda value (1000) occurred 91/500 times and that in the full sample of data this produced an intercept only model. The other 5 lambda values occurred a total of 132 out of 500 times and all values were generally in the same range (.54 - .69). All lambda values produced the same variables for selection in the full sample: sex (female), MoCA, left

superior frontal, and right pars-triangularis thickness. Note also that the right posterior cingulate occurred but not in all models.

The IRIOther-EC model produced six lambda values that occurred approximately greater than or equal to 5% of all resamples (i.e.,  $> \sim 25/500$ ). Table 5C shows the results for the IRIOther-EC models. Note that one large lambda value (1000) occurred 69/500 times and that in the full sample of data this produced an intercept only model. The other 5 lambda values occurred a total of 142 out of 500 times and all values were generally in the same range (.41 - .50). All lambda values produced the same variables for selection in the full sample: age, sex (Female), MoCA, right pars-triangularis, and right frontal pole thickness. Note also that the right posterior cingulate occurred but not in all models.

The IRIsself-PT model produced six lambda values that occurred approximately greater than or equal to 5% of all resamples (i.e.,  $> \sim 25/500$ ). Table 5D shows the results for the IRIsself-PT models. Note that one large lambda value (1000) occurred 109/500 times and that in the full sample of data this produced an intercept only model. The other 5 lambda values occurred a total of 140 out of 500 times and all values were generally in the same range (.27 - .34). All lambda values produced the same variables for selection in the full sample: age, sex (female), right lateral occipital, right pars-triangularis, right transverse temporal, and right insula thickness. Note that right parietal WMH occurred in several of these models, and that left paracentral, right inferior temporal, and right isthmus cingulate thickness occurred in some of these models.

The IRIsself-EC model produced 10 lambda values that occurred approximately greater than or equal to 5% of all resamples (i.e.,  $> \sim 25/500$ ). Table 5E shows the results for the IRIsself-EC models. The other 5 lambda values occurred a total of 297 out of 500 times and all values were generally in the same range (.25 - .43). All lambda values produced the same variables for selection

in the full sample: sex (female), MoCA, and right isthmus cingulate thickness. Note however, that other variables occurred less frequently and included (in order of how many models they were part of): right lateral occipital thickness, right pars-opercularis thickness, right occipital WMH, left insula, and left caudal anterior cingulate thickness.

### 3.5.2 *PLSc*

Our PLSc produced four components that explained: 73.37%, 15.62%, 6.67%, and 4.34% of the variance respectively. With permutation, we obtained p-values for those components as: 0.0712, 0.4624, 0.5692, and 0.1772. Given the large variance and relatively low permutation p-value we only interpreted Component 1 (though we also visualise Component 2 to help provide simpler visuals and more context). Figure 3 shows the component scores for the IRI values and all other measures respectively. Note that we show Components 1 and 2 but only refer to Component 1. IRIself-PT was not a stable contributor to Component 1 (see Table 6A). All IRI values (Figure 3A) appear in the same direction where IRIother-PT shows the highest amount of variance on Component 1. Many of the non-IRI variables (age, sex, MoCA, thickness, WMH) are also stable contributors to Component 1 (see Table 6B). Generally, the stable contributors go in the same direction as the IRI scores (see Figure 3B), which indicates a positive correlation between IRI scores and the other (stable) variables (e.g., MoCA). Though many variables are stable contributors we want to specifically highlight those that routinely showed up in the elastic net results: sex (female), MoCA, and right pars-triangularis thickness, which were also some of the strongest contributors to Component 1. Finally, in Figure 4, we can see the relationship of the participants with respect to the latent variables. Note that in Figure 4 participants are coloured by their respective dx. In Figure 4 we see that, generally, there is no dissociation of groups with the



exception of some particularly distant FTD participants. Overall, this indicates more of a spectrum and reflects the heterogeneity of the participants.

#### **4. Discussion**

To our knowledge, this is the first study to examine the relationships amongst WMH, cortical atrophy, and empathy in participants with various neurodegenerative and cerebrovascular diseases. Overall, our results indicated that empathy deficits were associated with significant WMH burden and cortical atrophy in participants with neurodegenerative and cerebrovascular diseases.

Empathy is a crucial component of social cognition [1,2]. In the current study, participants with FTD had lower ratings (self- and partner-reported) of EC and PT compared to other neurodegenerative and cerebrovascular diseases. Our findings parallel results from previous work [6,7]. Loss of both cognitive and affective empathy have primarily been found in participants with bvFTD [13,73], which accounted for a large portion of our FTD sample (40.4%). Lack of insight into one's behaviour underscores the importance of caregiver report for detection of empathy deficits in neurodegenerative disease [4,74], particularly in FTD [75], since the incongruent results from caregiver and patient empathy ratings provide an effective and reliable method for assessing changes in insight in patients with neurodegenerative diseases [44]. In keeping with this concept, EC ratings for participants and study partners were similar for AD/MCI, ALS, PD and CVD groups, but not in FTD. Furthermore, there was more variation on PT ratings amongst the groups, except in ALS. This is consistent with the notion that cognitive empathy is a more complicated and multi-faceted downstream cognitive process [76], and may be more predisposed to subtle impairment than affective empathy in non-FTD neurodegenerative diseases [7].

Cognitive empathy has been shown to be affected in AD/MCI due to its characteristic memory impairment [5,13,77–79]. Reports on empathy deficits in PD and ALS are inconsistent with some studies showing deficits in both aspects [3,10,17,21,80,81], whilst others found deficits only in cognitive empathy in PD [82,83] and emotional empathy in ALS [21]. This inconsistency can be attributed to several factors such as cognitive status and disease severity since most of the aforementioned studies were conducted on non-demented samples at different stages of disease progression. In CVD, the manifestation of empathy deficits depends on the location and size of the brain lesions [22,84,85].

We found that females had higher empathy scores than males, controlling for study partners' age and sex. Additionally, sex was a significant predictor of all empathy factors. This is consistent with previous studies reporting that females show greater emotional awareness than males [86,87]. Baez et al. [88] reported females exhibited higher scores than males across self-reported IRI factors and sex was a significant predictor of IRI. We included study partners' empathy ratings as another measure of empathy and also to mitigate the lack of insight in neurodegenerative and cerebrovascular diseases. However, our results suggest that sex differences are likely retained in these population and it is important to include sex as a confounding variable in analyses including both self- and partner-reported IRI measures.

As expected at the neuroanatomical level, changes in cognitive and emotional empathy were associated with cortical atrophy in a broad range of regions including the superior and middle frontal, pars-triangularis and pars-opercularis, frontal pole, insula, transverse and inferior temporal, isthmus, anterior, and posterior cingulate – major regions implicated in empathy [3,7]. Although we observed a bilateral pattern of results, there was predominant involvement of the right hemisphere. These results resonate with previous findings emphasising the importance of the

right hemisphere in empathy deficit in these populations [6,7,13,22]. The right cingulate cortex and insula have been implicated in emotion contagion and emotional empathy [89]. Furthermore, some functional neuroimaging studies have demonstrated the prefrontal cortex, frontal pole, and temporal regions in mediating complex cognitive function, including PT and mentalisation [5,90,91]. Multani et al. [5] found a loss of cognitive empathy and emotional detection deficit in AD, bvFTD, and PD that were related to decreased functional connectivity mainly in the right inferior temporal gyrus, frontal pole, paracingulate gyrus, insular, and inferior parietal lobule. Likewise, one study reported stronger activation in the right superior, middle, and inferior frontal cortices in adults when performing tasks associated with cognitive empathy and theory of mind (ToM) [90], whilst another study found increased activity in the right middle frontal during cognitive perception of emotional pain [91]. Collectively, these findings suggest a disturbance in the salience and default mode networks in our sample, which are activated during the selection and monitoring of salient emotional stimuli and the perception of self and other emotional state, respectively [3]. There may be a susceptibility of these networks as the basis of empathy deficit in neurodegenerative and cerebrovascular diseases [92].

In addition to functional neuroimaging studies, evidence from brain lesion studies have shown that individuals with stroke and tumour in the insula, temporal pole, inferior frontal gyrus, and prefrontal cortex present with impairment in emotional contagion, emotional, and cognitive empathy [22,84,89,93,94]. Leigh et al. [22] reported an association between impaired affective empathy and infarcts in the temporal pole and anterior insula in patients with right ischaemic stroke. Similarly, results from Yeh et al. [95] demonstrated that patients with strokes affecting the right cortico-striatal-thalamic-cortical circuitry were significantly more impaired in cognitive empathy than affective, when compared to controls after adjusting for global cognition. Together,

these results imply a right hemisphere empathy bias, as discussed above, such that damage to these areas might interrupt the integration and coordination of socioemotional awareness essential to accurately acknowledge ones and another's affective state [89]. Whilst most of the resultant brain regions were FTD related, our results do indicate an overlap in the neural bases of empathy across various neurodegenerative and cerebrovascular diseases, and alteration in the fronto-insulo-temporal networks might explain the personality and behavioural abnormalities seen in these populations [3].

Notably, an important finding in our study was that increased WMH volume in the right parietal and occipital lobes were associated with empathy deficit though, not stable contributors like cortical atrophy. WMH have commonly been associated with either vascular causes or inflammatory processes [25,96]. In most neurodegenerative diseases, they are associated with SVD [25]. However, increasing evidence has shown that non-vascular pathology such as tau-mediated secondary demyelination or microglial dysfunction may also contribute to WMH in neurodegenerative diseases [97,98]. In line with vascular origin, our results are consistent with findings from Kynast et al. [99]. Compared to individuals with mild and moderate WMH ratings and healthy controls, individuals with severe WMH rating demonstrated deficits in attention, memory, and ToM [99]. Empathic response usually involves cognitive and affective ToM brain networks thus, showing the multidimensional constructs amongst several components of social cognition [100]. As studies analysing WMH in the context of empathy deficits are non-existent, this is the first study supporting the detrimental effect of extensive age and vascular-related WMH on empathy across various neurodegenerative and cerebrovascular diseases using a harmonised dementia imaging protocol across multiple study centres. Moreover, we assume that progression

of WMH might disrupt critical brain networks and tracts, leading to impaired emotional recognition and empathy deficit [5].

Our study has both limitations and strengths. Firstly, since this was not a longitudinal analysis, we could not address the causal relationships amongst WMH, cortical atrophy and empathy deficit. Future studies should investigate the long-term synergistic effects of WMH and atrophy on empathy deficits in neurodegenerative and cerebrovascular diseases. Secondly, neuroimaging studies in healthy controls (not included in the ONDRI project) are crucial in identifying the structural anatomy and functional circuitry implicated in empathy [101]. Also, comparing cognitive and behavioural tests results from neurodegenerative and cerebrovascular cohorts with matched healthy controls provides an opportunity to examine the degree of dysfunction within the affected groups. Therefore, the absence of healthy controls in our study might impact the generalisability of our results. Another possible limitation could include the heterogeneity in age, functional, and cognitive status amongst our groups. However, we controlled for these in our analyses. Lastly, the diagnoses of MCI and AD as well as the other disease categories were made using clinical and imaging parameters but without diagnostic biomarkers. Mixed neuropathology is very common and increasingly recognised in neurodegenerative diseases [102]. Therefore, a contribution from the presence of mixed pathology to our findings is plausible.

Amongst the strengths of the current study was the inclusion of multiple neurodegenerative and cerebrovascular diseases, especially participants with PD, ALS, and CVD. This is because previous social cognition research has concentrated on analyses within a single disease [21,78,103] or multiple diseases, mainly consisting of AD/MCI, FTD [6,7,13,104], and sometimes PD [5,17]. Another strength is the implementation of previously validated semi-automated lesion segmentation pipeline capable of detecting subtle cerebrovascular alterations in multi-centre data

[48] and a hybrid approach at estimating cortical atrophy [60]. The hybrid approach improved segmentation fidelity of the brain and tissue thereby, decreasing failure rates and preventing the loss of data.

In conclusion, our findings demonstrate the loss of empathy in neurodegenerative and cerebrovascular diseases. In addition, the manifestation of empathy deficits may reflect disconnection of cortico-subcortical structures that are crucial for successful cognitive and behavioural functioning. Our study offers important insights into the role of localised vascular white matter lesion and cortical atrophy on empathy. Given that changes in empathy are associated with caregiver distress, burden, and depression [17,105,106], further study into prevention and treatment of modifiable vascular risk factors that can lead to SVD should be undertaken.

**Acknowledgements:** We would like to thank the ONDRI participants for the time, consent, and participation in our study. The manuscript has been submitted to bioRxiv preprint.

**Conflict of Interest:** TKR has received research support from Brain Canada, Brain and Behavior Research Foundation, BrightFocus Foundation, Canada Foundation for Innovation, Canada Research Chair, Canadian Institutes of Health Research, Centre for Aging and Brain Health Innovation, National Institutes of Health, Ontario Ministry of Health and Long-Term Care, Ontario Ministry of Research and Innovation, and the Weston Brain Institute. TKR also received in-kind equipment support for an investigator-initiated study from Magstim, and in-kind research accounts from Scientific Brain Training Pro. DPB is supported by a Wellcome Clinical Research Career Development Fellowship (214571/Z/18/Z). Other authors declare that the research was conducted in the absence of any commercial or financial relationships that could be construed as a potential conflict of interest.

**Funding:** This research was conducted with the support of the Ontario Brain Institute, an independent non-profit corporation, funded partially by the Ontario government. The opinions, results, and conclusions are those of the authors and no endorsement by the Ontario Brain Institute is intended or should be inferred. Matching funds were provided by participant hospital and research foundations, including the Baycrest Foundation, Bruyere Research Institute, Centre for Addiction and Mental Health Foundation, London Health Sciences Foundation, McMaster University Faculty of Health Sciences, Ottawa Brain and Mind Research Institute, Queen's University Faculty of Health Sciences, the Thunder Bay Regional Health Sciences Centre, the University of Ottawa Faculty of Medicine, University Health Network, Sunnybrook, and the Windsor/Essex County ALS Association. The Temerty Family Foundation provided the major infrastructure matching funds.

**Authors' Contributions:** MO: Conceptualisation, Data Curation, Formal Analysis, Investigation, Methodology, Project Administration, Software, Visualisation, and Writing (draft, review, and editing). BV: Conceptualisation, Investigation, Methodology, Project Administration, Writing (review, and editing). DB: Data Curation, Formal Analysis, Supervision, Methodology, Software, Visualisation, and Writing (draft, review, and editing). JR: Data Curation, Supervision, and Writing (review and editing). MFH, PM, AR, CJMS, and BT: Data Curation and Writing (review and editing). KS: Data Curation, Software, Writing (review and editing). JR, SA, and MG: Writing (review and editing). DK: Data Curation, Project Administration, Writing (review and editing). FG: Data Curation, Validation, Resources, Writing (review and editing). RB: Data Curation, Resources, Funding Acquisition, Writing (review and editing). AR, SS, RHS, AA, GS, MM, AEL, CM, SEB, LZ, CS, MM, CF, AF, MF, MMO, SK, SP, BP, TKR, DS, DT, MC, JT, DD, AH, LC, JM, DS, DPB, DG, MJ, TS, and EF: Resources, Funding Acquisition, Writing (review and editing). MCT: Conceptualisation, Investigation, Methodology, Supervision, Resources, Funding Acquisition, Writing (review and editing). All authors contributed to the article and approved the submitted version.

**ONDRI Investigators:** Michael Strong, Peter Kleinstiver, Natalie Rashkovan, Susan Bronskil, Julia Fraser, Bill McIlroy, Ben Cornish, Karen Van Ooteghem, Frederico Faria, Yanina Sarquis-Adamson, Alanna Black, Barry Greenberg, Wendy Hatch, Chris Hudson, Elena Leontieva, Ed Margolin, Efrem Mandelcorn, Faryan Tayyari, Sherif Defrawy, Don Brien, Ying Chen, Brian Coe, Doug Munoz, Alisia Southwell, Dennis Bulman, Allison Ann Dillio, Mahdi Ghani, Rob Hegele, John Robinson, Ekaterina Rogaeva, Sali Farhan, Hassan Haddad, Manuel Nuwan Nanayakkara, Courtney Berezuk, Sabrina Adamo, Malcolm Binns, Wendy Lou, Athena Theyers, Abiramy



Uthirakumaran, Guangyong (GY) Zou, Sujeevini Sujanthan, Mojdeh Zamyadi, David Munoz, Roger A. Dixon, John Woulfe, Brian Levine, JB Orange, Alicia Peltsch, Angela Troyer.

### **Ethics approval and consent to participate**

The studies involving human participants were reviewed and approved by ONDRI. Study participants were recruited at various health centers across Ontario, Canada: London Health Science Centre and Parkwood Institute in London; Hamilton General Hospital and McMaster Medical Centre in Hamilton; The Ottawa Civic Hospital in Ottawa; Thunder Bay Regional Health Sciences Centre in Thunder Bay; St. Michael's Hospital, Sunnybrook Health Sciences Centre, Baycrest Health Sciences, Centre for Addiction and Mental Health, and Toronto Western Hospital (University Health Network) in Toronto. Ethics approval was obtained from all participating institutions and performed in accordance with the Declaration of Helsinki. All participants and study partners provided informed consent. The patients/participants provided their written informed consent to participate in this study.

### **Data Availability Statement**

The datasets presented in this article are not readily available because the ONDRI data will be made publicly available through an application process. For more information on the ONDRI project, please visit: <http://ondri.ca/>. Requests to access the datasets should be directed to <http://ondri.ca/>.

## References

- [1] Davis MH (1983) Measuring individual differences in empathy: Evidence for a multidimensional approach. *J Pers Soc Psychol* **44**, 113–126.
- [2] Baron-Cohen S, Wheelwright S (2004) The Empathy Quotient: An Investigation of Adults with Asperger Syndrome or High Functioning Autism, and Normal Sex Differences. *J Autism Dev Disord* **34**, 163–175.
- [3] Christidi F, Migliaccio R, Santamaría-García H, Santangelo G, Trojsi F (2018) Social Cognition Dysfunctions in Neurodegenerative Diseases: Neuroanatomical Correlates and Clinical Implications. *Behav Neurol* **2018**, 1–18.
- [4] Pick E, Kleinbub JR, Mannarini S, Palmieri A (2019) Empathy In Neurodegenerative Diseases: A Systematic Review. *Neuropsychiatr Dis Treat* **Volume 15**, 3287–3304.
- [5] Multani N, Taghdiri F, Anor CJ, Varriano B, Misquitta K, Tang-Wai DF, Keren R, Fox S, Lang AE, Vijverman AC, Marras C, Tartaglia MC (2019) Association Between Social Cognition Changes and Resting State Functional Connectivity in Frontotemporal Dementia, Alzheimer’s Disease, Parkinson’s Disease, and Healthy Controls. *Front Neurosci* **13**,.
- [6] Eslinger PJ, Moore P, Anderson C, Grossman M (2011) Social cognition, executive functioning, and neuroimaging correlates of empathic deficits in frontotemporal dementia. *J Neuropsychiatry Clin Neurosci* **23**, 74–82.
- [7] Rankin KP, Gorno-Tempini ML, Allison SC, Stanley CM, Glenn S, Weiner MW, Miller BL (2006) Structural anatomy of empathy in neurodegenerative disease. *Brain* **129**, 2945–2956.
- [8] Baez S, Manes F, Huepe D, Torralva T, Fiorentino N, Richter F, Huepe-Artigas D, Ferrari

- J, Montañes P, Reyes P, Matallana D, Vigliecca NS, Decety J, Ibanez A (2014) Primary empathy deficits in frontotemporal dementia. *Front Aging Neurosci* **6**,.
- [9] Cosentino S, Zahodne LB, Brandt J, Blacker D, Albert M, Dubois B, Stern Y (2014) Social cognition in Alzheimer's disease: A separate construct contributing to dependence. *Alzheimer's Dement* **10**, 818–826.
- [10] Gray HM, Tickle-Degnen L (2010) A meta-analysis of performance on emotion recognition tasks in Parkinson's disease. *Neuropsychology* **24**, 176–191.
- [11] Kleinbub JR, Palmieri A, Broggio A, Pagnini F, Benelli E, Sambin M, Sorar<sup>1</sup> G (2015) Hypnosis-based psychodynamic treatment in ALS: a longitudinal study on patients and their caregivers. *Front Psychol* **6**,.
- [12] Bodden ME, Mollenhauer B, Trenkwalder C, Cabanel N, Eggert KM, Unger MM, Oertel WH, Kessler J, Dodel R, Kalbe E (2010) Affective and cognitive theory of mind in patients with parkinson's disease. *Parkinsonism Relat Disord* **16**, 466–470.
- [13] Dermody N, Wong S, Ahmed R, Piguet O, Hodges JR, Irish M (2016) Uncovering the Neural Bases of Cognitive and Affective Empathy Deficits in Alzheimer's Disease and the Behavioral-Variant of Frontotemporal Dementia. *J Alzheimer's Dis* **53**, 801–816.
- [14] Ariatti A, Benuzzi F, Nichelli P (2008) Recognition of emotions from visual and prosodic cues in Parkinson's disease. *Neurol Sci* **29**, 219–227.
- [15] ASSOGNA F, PONTIERI FE, CRAVELLO L, PEPPE A, PIERANTOZZI M, STEFANI A, STANZIONE P, PELLICANO C, CALTAGIRONE C, SPALLETTA G (2010) Intensity-dependent facial emotion recognition and cognitive functions in Parkinson's disease. *J Int Neuropsychol Soc* **16**, 867–876.
- [16] Kan Y, Kawamura M, Hasegawa Y, Mochizuki S, Nakamura K (2002) Recognition Of

- Emotion From Facial, Prosodic And Written Verbal Stimuli In Parkinson's Disease.  
*Cortex* **38**, 623–630.
- [17] Martinez M, Multani N, Anor CJ, Misquitta K, Tang-Wai DF, Keren R, Fox S, Lang AE, Marras C, Tartaglia MC (2018) Emotion Detection Deficits and Decreased Empathy in Patients with Alzheimer's Disease and Parkinson's Disease Affect Caregiver Mood and Burden. *Front Aging Neurosci* **10**,.
- [18] Skuse DH, Gallagher L (2009) Dopaminergic-neuropeptide interactions in the social brain. *Trends Cogn Sci* **13**, 27–35.
- [19] Ibarretxe-Bilbao N, Junque C, Tolosa E, Marti M-J, Valldeoriola F, Bargallo N, Zarei M (2009) Neuroanatomical correlates of impaired decision-making and facial emotion recognition in early Parkinson's disease. *Eur J Neurosci* **30**, 1162–1171.
- [20] Baggio HC, Segura B, Ibarretxe-Bilbao N, Valldeoriola F, Marti MJ, Compta Y, Tolosa E, Junqué C (2012) Structural correlates of facial emotion recognition deficits in Parkinson's disease patients. *Neuropsychologia* **50**, 2121–2128.
- [21] Cerami C, Dodich A, Canessa N, Crespi C, Iannaccone S, Corbo M, Lunetta C, Consonni M, Scola E, Falini A, Cappa SF (2014) Emotional empathy in amyotrophic lateral sclerosis: a behavioural and voxel-based morphometry study. *Amyotroph Lateral Scler Front Degener* **15**, 21–29.
- [22] Leigh R, Oishi K, Hsu J, Lindquist M, Gottesman RF, Jarso S, Crainiceanu C, Mori S, Hillis AE (2013) Acute lesions that impair affective empathy. *Brain* **136**, 2539–2549.
- [23] De Groot JC, De Leeuw F-E, Oudkerk M, Van Gijn J, Hofman A, Jolles J, Breteler MMB (2002) Periventricular cerebral white matter lesions predict rate of cognitive decline. *Ann Neurol* **52**, 335–341.

- [24] Garde E, Mortensen EL, Krabbe K, Rostrup E, Larsson HB (2000) Relation between age-related decline in intelligence and cerebral white-matter hyperintensities in healthy octogenarians: a longitudinal study. *Lancet* **356**, 628–634.
- [25] Wardlaw JM, Valdés Hernández MC, Muñoz-Maniega S (2015) What are White Matter Hyperintensities Made of? *J Am Heart Assoc* **4**,.
- [26] Barber R, Scheltens P, Gholkar A, Ballard C, McKeith I, Ince P, Perry R, O'Brien J (1999) White matter lesions on magnetic resonance imaging in dementia with Lewy bodies, Alzheimer's disease, vascular dementia, and normal aging. *J Neurol Neurosurg Psychiatry* **67**, 66–72.
- [27] Kee Hyung Park, Lee J-Y, Na DL, Seong Yoon Kim, Cheong H-K, So Young Moon, Shim YS, Kyung Won Park, Ku BD, Seong Hye Choi, Joo H, Joong Sun Lee, Seok Min Go, Sook Hui Kim, SangYun Kim, Kyung Ryeol Cha, Lee J, Sang Won Seo (2011) Different Associations of Periventricular and Deep White Matter Lesions with Cognition, Neuropsychiatric Symptoms, and Daily Activities in Dementia. *J Geriatr Psychiatry Neurol* **24**, 84–90.
- [28] Starkstein SE, Mizrahi R, Capizzano AA, Acion L, Brockman S, Power BD (2009) Neuroimaging Correlates of Apathy and Depression in Alzheimer's Disease. *J Neuropsychiatry Clin Neurosci* **21**, 259–265.
- [29] Soennesyn H, Oppedal K, Greve OJ, Fritze F, Auestad BH, Nore SP, Beyer MK, Aarsland D (2012) White Matter Hyperintensities and the Course of Depressive Symptoms in Elderly People with Mild Dementia. *Dement Geriatr Cogn Dis Extra* **2**, 97–111.
- [30] Anor CJ, O'Connor S, Saund A, Tang-Wai DF, Keren R, Tartaglia MC (2017) Neuropsychiatric Symptoms in Alzheimer Disease, Vascular Dementia, and Mixed

- Dementia. *Neurodegener Dis* **17**, 127–134.
- [31] Kim HJ, Kang SJ, Kim C, Kim GH, Jeon S, Lee JM, Oh SJ, Kim JS, Choe YS, Lee KH, Noh Y, Cho H, Yoon CW, Chin J, Cummings JL, Lee JH, Na DL, Seo SW (2013) The effects of small vessel disease and amyloid burden on neuropsychiatric symptoms: a study among patients with subcortical vascular cognitive impairments. *Neurobiol Aging* **34**, 1913–1920.
- [32] Desmarais P, Gao A, Keith J, Lanctôt K, Rogaeva E, Ramirez J, Herrmann N, Stuss DT, Black S, Masellis M (2020) *White Matter Hyperintensities in Autopsy-Confirmed Frontotemporal Lobar Degeneration and Alzheimer's Disease*.
- [33] Farhan SMK, Bartha R, Black SE, Corbett D, Finger E, Freedman M, Greenberg B, Grimes DA, Hegele RA, Hudson C, Kleinstiver PW, Lang AE, Masellis M, McIlroy WE, McLaughlin PM, Montero-Odasso M, Munoz DG, Munoz DP, Strother S, Swartz RH, Symons S, Tartaglia MC, Zinman L, Strong MJ (2017) The Ontario Neurodegenerative Disease Research Initiative (ONDRI). *Can J Neurol Sci* **44**, 196–202.
- [34] Sunderland KM, Beaton D, Arnott SR, Kleinstiver P, Kwan D, Lawrence-Dewar JM, Ramirez J, Tan B, Bartha R, Black SE, Borrie M, Brien D, Casaubon LK, Coe B, Cornish B, Dilliot AA, Dowlatshahi D, Finger E, Fischer C, Frank A, Fraser J, Freedman M, Greenberg B, Grimes DA, Hassan A, Hatch W, Hegele RA, Hudson C, Jog M, Kumar S, Lang A, Levine B, Lou W, Mandzia J, Marras C, McIlroy W, Montero-Odasso M, Munoz DG, Munoz DP, Orange JB, Park DS, Pasternak SH, Pieruccini-Faria F, Rajji TK, Roberts AC, Robinson JF, Rogaeva E, Sahlas DJ, Saposnik G, Scott CJM, Seitz D, Shoesmith C, Steeves TDL, Strong MJ, Strother SC, Swartz RH, Symons S, Tang-Wai DF, Tartaglia MC, Troyer AK, Turnbull J, Zinman L, McLaughlin PM, Masellis M, Binns MA (2020)

The Ontario Neurodegenerative Disease Research Initiative. *medRxiv*

2020.07.30.20165456.

- [35] Albert MS, DeKosky ST, Dickson D, Dubois B, Feldman HH, Fox NC, Gamst A, Holtzman DM, Jagust WJ, Petersen RC, Snyder PJ, Carrillo MC, Thies B, Phelps CH (2011) The diagnosis of mild cognitive impairment due to Alzheimer's disease: recommendations from the National Institute on Aging-Alzheimer's Association workgroups on diagnostic guidelines for Alzheimer's disease. *Alzheimers Dement* **7**, 270–9.
- [36] McKhann GM, Knopman DS, Chertkow H, Hyman BT, Jack CR, Kawas CH, Klunk WE, Koroshetz WJ, Manly JJ, Mayeux R, Mohs RC, Morris JC, Rossor MN, Scheltens P, Carrillo MC, Thies B, Weintraub S, Phelps CH (2011) The diagnosis of dementia due to Alzheimer's disease: recommendations from the National Institute on Aging-Alzheimer's Association workgroups on diagnostic guidelines for Alzheimer's disease. *Alzheimers Dement* **7**, 263–9.
- [37] Brooks BR (1994) El Escorial World Federation of Neurology criteria for the diagnosis of amyotrophic lateral sclerosis. Subcommittee on Motor Neuron Diseases/Amyotrophic Lateral Sclerosis of the World Federation of Neurology Research Group on Neuromuscular Diseases and th. *J Neurol Sci* **124 Suppl**, 96–107.
- [38] Rascovsky K, Hodges JR, Knopman D, Mendez MF, Kramer JH, Neuhaus J, van Swieten JC, Seelaar H, Dopper EG, Onyike CU, Hillis AE, Josephs KA, Boeve BF, Kertesz A, Seeley WW, Rankin KP, Johnson JK, Gorno-Tempini ML, Rosen H, Prioleau-Latham CE, Lee A, Kipps CM, Lillo P, Piguet O, Rohrer JD, Rossor MN, Warren JD, Fox NC, Galasko D, Salmon DP, Black SE, Mesulam M, Weintraub S, Dickerson BC, Diehl-

- Schmid J, Pasquier F, Deramecourt V, Lebert F, Pijnenburg Y, Chow TW, Manes F, Grafman J, Cappa SF, Freedman M, Grossman M, Miller BL (2011) Sensitivity of revised diagnostic criteria for the behavioural variant of frontotemporal dementia. *Brain* **134**, 2456–2477.
- [39] Gorno-Tempini ML, Hillis AE, Weintraub S, Kertesz A, Mendez M, Cappa SF, Ogar JM, Rohrer JD, Black S, Boeve BF, Manes F, Dronkers NF, Vandenberghe R, Rascovsky K, Patterson K, Miller BL, Knopman DS, Hodges JR, Mesulam MM, Grossman M (2011) Classification of primary progressive aphasia and its variants. *Neurology* **76**, 1006–1014.
- [40] Hauw J-J, Daniel SE, Dickson D, Horoupian DS, Jellinger K, Lantos PL, McKee A, Tabaton M, Litvan I (1994) Preliminary NINDS neuropathologic criteria for Steele-Richardson-Olszewski syndrome (progressive supranuclear palsy). *Neurology* **44**, 2015–2015.
- [41] Armstrong MJ, Litvan I, Lang AE, Bak TH, Bhatia KP, Borroni B, Boxer AL, Dickson DW, Grossman M, Hallett M, Josephs KA, Kertesz A, Lee SE, Miller BL, Reich SG, Riley DE, Tolosa E, Tröster AI, Vidailhet M, Weiner WJ (2013) Criteria for the diagnosis of corticobasal degeneration. *Neurology* **80**, 496–503.
- [42] Gibb WR, Lees AJ (1988) The relevance of the Lewy body to the pathogenesis of idiopathic Parkinson’s disease. *J Neurol Neurosurg Psychiatry* **51**, 745–52.
- [43] Hachinski V, Iadecola C, Petersen RC, Breteler MM, Nyenhuis DL, Black SE, Powers WJ, Decarli C, Merino JG, Kalaria RN, Vinters H V, Holtzman DM, Rosenberg GA, Wallin A, Dichgans M, Marler JR, Leblanc GG (2006) National Institute of Neurological Disorders and Stroke-Canadian Stroke Network vascular cognitive impairment harmonization standards. *Stroke* **37**, 2220–2241.



- [44] Rankin KP, Kramer JH, Miller BL (2005) Patterns of Cognitive and Emotional Empathy in Frontotemporal Lobar Degeneration. *Cogn Behav Neurol* **18**, 28–36.
- [45] Nasreddine ZS, Phillips NA, Bedirian V, Charbonneau S, Whitehead V, Collin I, Cummings JL, Chertkow H (2005) The Montreal Cognitive Assessment, MoCA: a brief screening tool for mild cognitive impairment. *J Am Geriatr Soc* **53**, 695–699.
- [46] Lawton MP, Brody EM (1969) Assessment of Older People: Self-Maintaining and Instrumental Activities of Daily Living. *Gerontologist* **9**, 179–186.
- [47] Scott CJM, Arnott SR, Chemparathy A, Dong F, Solovey I, Gee T, Schmah T, Lobaugh N, Nanayakkara N, Liang S, Zamyadi M, Ozzoude M, Holmes MF, Szilagyi GM, Ramirez J, Symons S, Black SE, Bartha R, Strother S (2020) An overview of the quality assurance and quality control of magnetic resonance imaging data for the Ontario Neurodegenerative Disease Research Initiative ( ONDRI ): pipeline development and neuroinformatics. *bioRxiv*.
- [48] Ramirez J, Holmes MF, Scott CJM, Ozzoude M, Adamo S, Szilagyi GM, Gao F, Arnott SR, Dewar JML, Beaton D, Strother SC, Douglas P, Masellis M, Swartz RH, Bartha R, Symons S, Black SE, Investigators O (2020) Ontario Neurodegenerative Disease Research Initiative (ONDRI): Structural MRI methods & outcome measures. *Front Neurol*.
- [49] Duchesne S, Chouinard I, Potvin O, Fonov VS, Khademi A, Bartha R, Bellec P, Collins DL, Descoteaux M, Hoge R, McCreary CR, Ramirez J, Scott CJM, Smith EE, Strother SC, Black SE, CIMA-Q group and the CCNA group (2019) The Canadian Dementia Imaging Protocol: Harmonizing National Cohorts. *J Magn Reson Imaging* **49**, 456–465.
- [50] Dade LA, Gao FQ, Kovacevic N, Roy P, Rockel C, O’Toole CM, Lobaugh NJ, Feinstein A, Levine B, Black SE (2004) Semiautomatic brain region extraction: a method of

- parcellating brain regions from structural magnetic resonance images. *Neuroimage* **22**, 1492–1502.
- [51] Gibson E, Gao F, Black SE, Lobaugh NJ (2010) Automatic segmentation of white matter hyperintensities in the elderly using FLAIR images at 3T. *J Magn Reson* **31**, 1311–1322.
- [52] Kovacevic N, Lobaugh NJ, Bronskill MJ, Levine B, Feinstein A, Black SE (2002) A robust method for extraction and automatic segmentation of brain images. *Neuroimage* **17**, 1087–1100.
- [53] Ramirez J, McNeely AA, Scott CJM, Masellis M, Black SE (2015) White matter hyperintensity burden in elderly cohort studies. The Sunnybrook Dementia Study, Alzheimer Disease Neuroimaging Initiative, and Three-City Study. *Alzheimers Dement.*
- [54] Ramirez J, McNeely AA, Scott CJ, Stuss DT, Black SE (2014) Subcortical hyperintensity volumetrics in Alzheimer’s disease and normal elderly in the Sunnybrook Dementia Study: correlations with atrophy, executive function, mental processing speed, and verbal memory. *Alzheimers Res Ther* **6**, 49.
- [55] Ramirez J, McNeely a, Scott CJM, Stuss DT, Black SE (2013) Strategic regional subcortical hyperintensity volumetrics in Alzheimer’s disease and normal elderly: correlations with executive function, mental processing speed, and verbal memory. *Neurbiology of Aging* (**submitted**, 1–12.
- [56] Ramirez J, Gibson E, Qudus A, Lobaugh NJ, Feinstein A, Levine B, Scott CJM, Levy-Cooperman N, Gao FQ, Black SE (2011) Lesion Explorer: A comprehensive segmentation and parcellation package to obtain regional volumetrics for subcortical hyperintensities and intracranial tissue. *Neuroimage* **54**, 963–973.
- [57] Sunderland KM, Beaton D, Fraser J, Kwan D, McLaughlin PM, Montero-Odasso M,

- Peltsch AJ, Pieruccini-Faria F, Sahlas DJ, Swartz RH, Strother SC, Binns MA, Binns MA (2019) The utility of multivariate outlier detection techniques for data quality evaluation in large studies: an application within the ONDRI project. *BMC Med Res Methodol* **19**, 102.
- [58] Fischl B (2012) FreeSurfer. *Neuroimage* **62**, 774–781.
- [59] Fischl B, Liu A, Dale AM (2001) Automated manifold surgery: constructing geometrically accurate and topologically correct models of the human cerebral cortex. *IEEE Trans Med Imaging* **20**, 70–80.
- [60] Ozzoude M, Ramirez J, Raamana PR, Holmes MF, Walker K, Scott CJM, Gao F, Goubran M, Kwan D, Tartaglia MC, Beaton D, Saposnik G, Hassan A, Lawrence-Dewar J, Dowlatshahi D, Strother SC, Symons S, Bartha R, Swartz RH, Black SE (2020) Cortical Thickness Estimation in Individuals With Cerebral Small Vessel Disease, Focal Atrophy, and Chronic Stroke Lesions. *Front Neurosci* **14**,.
- [61] Wickham H (2009) *ggplot2: Elegant Graphics for Data Analysis*.
- [62] Desikan RS, Ségonne F, Fischl B, Quinn BT, Dickerson BC, Blacker D, Buckner RL, Dale AM, Maguire RP, Hyman BT, Albert MS, Killiany RJ (2006) An automated labeling system for subdividing the human cerebral cortex on MRI scans into gyral based regions of interest. *Neuroimage* **31**, 968–980.
- [63] Zou H, Hastie T (2005) Regularization and variable selection via the elastic net. *J R Stat Soc Ser B (Statistical Methodol)* **67**, 301–320.
- [64] Friedman J, Hastie T, Tibshirani R (2010) Regularization Paths for Generalized Linear Models via Coordinate Descent. *J Stat Softw* **33**, 1–22.
- [65] Krishnan A, Williams LJ, McIntosh AR, Abdi H (2011) Partial Least Squares (PLS)

- methods for neuroimaging: A tutorial and review. *Neuroimage* **56**, 455–475.
- [66] McIntosh AR, Bookstein FL, Haxby J V, Grady CL (1996) Spatial pattern analysis of functional brain images using partial least squares. *Neuroimage* **3**, 143–57.
- [67] Beaton D, Chin Fatt CR, Abdi H (2014) An ExPosition of multivariate analysis with the singular value decomposition in R. *Comput Stat Data Anal* **72**, 176–189.
- [68] James G, Witten D, Hastie T, Tibshirani R (2013) *An Introduction to Statistical Learning*, Springer New York, New York, NY.
- [69] Berry KJ, Johnston JE, Mielke PW (2011) Permutation methods. *Wiley Interdiscip Rev Comput Stat* **3**, 527–542.
- [70] Peres-Neto PR, Jackson DA, Somers KM (2005) How many principal components? stopping rules for determining the number of non-trivial axes revisited. *Comput Stat Data Anal* **49**, 974–997.
- [71] Efron B, Tibshirani R (1986) Bootstrap Methods for Standard Errors, Confidence Intervals, and Other Measures of Statistical Accuracy. *Stat Sci* **1**,
- [72] Hesterberg T (2011) Bootstrap. *Wiley Interdiscip Rev Comput Stat* **3**, 497–526.
- [73] Piguet O, Hornberger M, Mioshi E, Hodges JR (2011) Behavioural-variant frontotemporal dementia: diagnosis, clinical staging, and management. *Lancet Neurol* **10**, 162–172.
- [74] Bartochowski Z, Gatla S, Khoury R, Al-Dahhak R, Grossberg GT (2018) Empathy changes in neurocognitive disorders: A review. *Ann Clin Psychiatry* **30**, 220–232.
- [75] Lough S, Kipps CM, Treise C, Watson P, Blair JR, Hodges JR (2006) Social reasoning, emotion and empathy in frontotemporal dementia. *Neuropsychologia* **44**, 950–8.
- [76] Decety J, Jackson PL (2004) The Functional Architecture of Human Empathy. *Behav Cogn Neurosci Rev* **3**, 71–100.

- [77] Narme P, Mouras H, Roussel M, Devendeville A, Godefroy O (2013) Assessment of socioemotional processes facilitates the distinction between frontotemporal lobar degeneration and Alzheimer's disease. *J Clin Exp Neuropsychol* **35**, 728–744.
- [78] Sturm VE, Yokoyama JS, Seeley WW, Kramer JH, Miller BL, Rankin KP (2013) Heightened emotional contagion in mild cognitive impairment and Alzheimer's disease is associated with temporal lobe degeneration. *Proc Natl Acad Sci* **110**, 9944–9949.
- [79] Fernandez-Duque D, Hodges SD, Baird JA, Black SE (2009) Empathy in frontotemporal dementia and Alzheimer's disease. *J Clin Exp Neuropsychol* 1–12.
- [80] Narme P, Mouras H, Roussel M, Duru C, Krystkowiak P, Godefroy O (2013) Emotional and cognitive social processes are impaired in Parkinson's disease and are related to behavioral disorders. *Neuropsychology* **27**, 182–192.
- [81] van der Hulst E-J, Bak TH, Abrahams S (2015) Impaired affective and cognitive theory of mind and behavioural change in amyotrophic lateral sclerosis. *J Neurol Neurosurg Psychiatry* **86**, 1208–1215.
- [82] Schmidt N, Paschen L, Deuschl G, Witt K (2017) Reduced Empathy Scores in Patients with Parkinson's Disease: A Non-Motor Symptom Associated with Advanced Disease Stages. *J Parkinsons Dis* **7**, 713–718.
- [83] Coundouris SP, Adams AG, Henry JD (2020) Empathy and theory of mind in Parkinson's disease: A meta-analysis. *Neurosci Biobehav Rev* **109**, 92–102.
- [84] Shamay-Tsoory SG, Tomer R, Goldsher D, Berger BD, Aharon-Peretz J (2004) Impairment in Cognitive and Affective Empathy in Patients with Brain Lesions: Anatomical and Cognitive Correlates. *J Clin Exp Neuropsychol* **26**, 1113–1127.
- [85] Shamay-Tsoory SG, Aharon-Peretz J (2007) Dissociable prefrontal networks for cognitive

- and affective theory of mind: A lesion study. *Neuropsychologia* **45**, 3054–3067.
- [86] Di Tella M, Miti F, Ardito RB, Adenzato M (2020) Social cognition and sex: Are men and women really different? *Pers Individ Dif* **162**, 110045.
- [87] Martínez-Velázquez ES, Ahuatzin González AL, Chamorro Y, Sequeira H (2020) The Influence of Empathy Trait and Gender on Empathic Responses. A Study With Dynamic Emotional Stimulus and Eye Movement Recordings. *Front Psychol* **11**,.
- [88] Baez S, Flichtentrei D, Prats M, Mastandueno R, García AM, Cetkovich M, Ibáñez A (2017) Men, women...who cares? A population-based study on sex differences and gender roles in empathy and moral cognition. *PLoS One* **12**, e0179336.
- [89] Hillis AE (2014) Inability to empathize: brain lesions that disrupt sharing and understanding another's emotions. *Brain* **137**, 981–997.
- [90] Kim EJ, Son J-W, Park SK, Chung S, Ghim H-R, Lee S, Lee S-I, Shin C-J, Kim S, Ju G, Park H, Lee J (2020) Cognitive and Emotional Empathy in Young Adolescents: an fMRI Study. *Soa--ch'ongsonyon chongsin uihak = J child Adolesc psychiatry* **31**, 121–130.
- [91] Naor N, Rohr C, Schaare LH, Limbachia C, Shamay-Tsoory S, Okon-Singer H (2020) The neural networks underlying reappraisal of empathy for pain. *Soc Cogn Affect Neurosci* **15**, 733–744.
- [92] Seeley WW, Allman JM, Carlin DA, Crawford RK, Macedo MN, Greicius MD, Dearmond SJ, Miller BL Divergent social functioning in behavioral variant frontotemporal dementia and Alzheimer disease: reciprocal networks and neuronal evolution. *Alzheimer Dis Assoc Disord* **21**, S50-7.
- [93] Couto B, Sedeño L, Sposato LA, Sigman M, Riccio PM, Salles A, Lopez V, Schroeder J, Manes F, Ibanez A (2013) Insular networks for emotional processing and social cognition:

- Comparison of two case reports with either cortical or subcortical involvement. *Cortex* **49**, 1420–1434.
- [94] Gu X, Gao Z, Wang X, Liu X, Knight RT, Hof PR, Fan J (2012) Anterior insular cortex is necessary for empathetic pain perception. *Brain* **135**, 2726–35.
- [95] Yeh Z-T, Tsai C-F (2014) Impairment on theory of mind and empathy in patients with stroke. *Psychiatry Clin Neurosci* **68**, 612–620.
- [96] Zhong Y, Utraiainen D, Wang Y, Kang Y, Haacke EM (2014) Automated White Matter Hyperintensity Detection in Multiple Sclerosis Using 3D T2 FLAIR. *Int J Biomed Imaging* **2014**, 1–7.
- [97] Woollacott IOC, Bocchetta M, Sudre CH, Ridha BH, Strand C, Courtney R, Ourselin S, Cardoso MJ, Warren JD, Rossor MN, Revesz T, Fox NC, Holton JL, Lashley T, Rohrer JD (2018) Pathological correlates of white matter hyperintensities in a case of progranulin mutation associated frontotemporal dementia. *Neurocase* **24**, 166–174.
- [98] McAleese KE, Walker L, Graham S, Moya ELJ, Johnson M, Erskine D, Colloby SJ, Dey M, Martin-Ruiz C, Taylor J-P, Thomas AJ, McKeith IG, De Carli C, Attems J (2017) Parietal white matter lesions in Alzheimer’s disease are associated with cortical neurodegenerative pathology, but not with small vessel disease. *Acta Neuropathol* **134**, 459–473.
- [99] Kynast J, Lampe L, Luck T, Frisch S, Arelin K, Hoffmann K-T, Loeffler M, Riedel-Heller SG, Villringer A, Schroeter ML (2018) White matter hyperintensities associated with small vessel disease impair social cognition beside attention and memory. *J Cereb Blood Flow Metab* **38**, 996–1009.
- [100] Dvash J, Shamay-Tsoory SG (2014) Theory of Mind and Empathy as Multidimensional

- Constructs. *Top Lang Disord* **34**, 282–295.
- [101] Shamay-Tsoory SG, Lester H, Chisin R, Israel O, Bar-Shalom R, Peretz A, Tomer R, Tsitrinbaum Z, Aharon-Peretz J (2005) The neural correlates of understanding the other's distress: a positron emission tomography investigation of accurate empathy. *Neuroimage* **27**, 468–72.
- [102] Kapasi A, DeCarli C, Schneider JA (2017) Impact of multiple pathologies on the threshold for clinically overt dementia. *Acta Neuropathol* **134**, 171–186.
- [103] Hua AY, Sible IJ, Perry DC, Rankin KP, Kramer JH, Miller BL, Rosen HJ, Sturm VE (2018) Enhanced Positive Emotional Reactivity Undermines Empathy in Behavioral Variant Frontotemporal Dementia. *Front Neurol* **9**,.
- [104] Sollberger M, Stanley CM, Wilson SM, Gyurak A, Beckman V, Growdon M, Jang J, Weiner MW, Miller BL, Rankin KP (2009) Neural basis of interpersonal traits in neurodegenerative diseases. *Neuropsychologia* **47**, 2812–2827.
- [105] Miller LA, Mioshi E, Savage S, Lah S, Hodges JR, Piguet O (2013) Identifying Cognitive and Demographic Variables That Contribute to Carer Burden in Dementia. *Dement Geriatr Cogn Disord* **36**, 43–49.
- [106] Brown CL, Lwi SJ, Goodkind MS, Rankin KP, Merrilees J, Miller BL, Levenson RW (2018) Empathic Accuracy Deficits in Patients with Neurodegenerative Disease: Association with Caregiver Depression. *Am J Geriatr Psychiatry* **26**, 484–493.



**Table 1** Demographic, clinical, empathy, and neuroimaging characteristics across diagnostic groups.

**Table 2** Study partner demographics.

**Table 3** Participant sex difference on empathy controlled for study partners' sex and age.

**Table 4** Group level cortical thickness analysis showing significant clusters adjusted for age and corrected for multiple comparisons.

**Table 5A** Demographics and summary for all elastic net and PLS<sub>c</sub> analyses.

**Table 5B** IRIOther-PT analyses.

**Table 5C** IRIOther-EC analyses.

**Table 5D** IRIsself-PT analyses.

**Table 5E** IRIsself-EC analyses.

**Table 6A** Bootstrap ratios for the empathy subscale scores.

**Table 6B** Bootstrap ratios for all other variables (only those above magnitude of 2 are shown).

**Figure. 1** Boxplots showing empathy scores classified by groups. *Notes:* AD, Alzheimer's Disease; ALS, Amyotrophic lateral sclerosis; CVD, Cerebrovascular disease; EC, Emotional Concern; FTD, Frontotemporal disease; IRI, Interpersonal Reactivity Index; MCI, Mild Cognitive Impairment; PD, Parkinson's disease; PT, Perspective Taking.

**Figure. 2** Cortical thickness analysis showing regions with cortical thinning in (A) CVD vs ALS; (B) CVD vs PD; (C) FTD vs AD/MCI; (D) FTD vs ALS; (E) FTD vs PD, and (F) FTD vs CVD. *Notes:* AD, Alzheimer's Disease; ALS, Amyotrophic lateral sclerosis; CVD, Cerebrovascular disease; FTD, Frontotemporal disease; MCI, Mild Cognitive Impairment; LLOF, Left lateral orbitofrontal; LParsO, Left pars-opercularis; LPosC, Left postcentral; LSP, Left superior parietal; LInsu, Left Insula; LIT, Left inferior temporal; RLOF, Right lateral orbitofrontal; RST, Right superior temporal; RMT, Right middle temporal; RSF, Right superior frontal; RIT, Right inferior temporal; PD, Parkinson's disease.

**Figure. 3** Partial Least Squares Correlation Diagram. (A) component scores for IRI subscales; (B) component score for stable contributors. The values for all IRI subscales appear in the same direction where IRI<sub>other-PT</sub> shows the highest amount of variance on Component 1. IRI<sub>self-PT</sub> was not a stable contributor to Component 1. The stable contributors go in the same direction as the IRI scores, indicating a positive correlation between them. EC, Empathic Concern; IRI, Interpersonal Reactivity Index; PT, Perspective Taking.

**Figure. 4** Relationship between diagnosis, IRI, and contributors. IRI, Interpersonal Reactivity Index; FS, FreeSurfer cortical thickness (68 regions); WMH, lobar white matter hyperintensities (10 regions); MoCA = Montreal Cognitive Assessment; AD, Alzheimer's Disease; ALS, Amyotrophic lateral sclerosis; CVD, Cerebrovascular disease; FTD, Frontotemporal disease; MCI, Mild Cognitive Impairment; PD, Parkinson's disease.

**Table 1** Demographic, clinical, empathy, and neuroimaging characteristics across diagnostic groups.

|                                          | <b>AD/MCI</b><br>(N=126)<br>Mean (SD) | <b>ALS</b><br>(N = 40)<br>Mean (SD) | <b>FTD</b><br>(N = 52)<br>Mean (SD) | <b>PD</b><br>(N = 140)<br>Mean (SD) | <b>CVD</b><br>(N = 155)<br>Mean (SD) | Effect size $\eta^2/V$ | F/ $\chi^2$ , p-value              |
|------------------------------------------|---------------------------------------|-------------------------------------|-------------------------------------|-------------------------------------|--------------------------------------|------------------------|------------------------------------|
| Age (years)                              | 71.03 (8.16)                          | 61.98 (8.74)                        | 67.81 (7.12)                        | 67.94 (6.34)                        | 69.35 (7.36)                         | $\eta^2 = 0.09$        | $F_{(4,508)} = 12.18, p < 0.001^a$ |
| Sex (F:M) (% F)                          | 57:69 (45.2)                          | 16:24 (40.0)                        | 19:33 (36.5)                        | 31:109 (22.1)                       | 49:106 (31.6)                        | $V = 0.18$             | $\chi^2 (4) = 17.11, p = 0.002$    |
| Education (years)                        | 15.23 (3.08)                          | 13.83 (2.88)                        | 13.89 (2.73)                        | 15.49 (2.73)                        | 14.69 (2.88)                         | $\eta^2 = 0.04$        | $F_{(4,508)} = 5.09, p = 0.001^b$  |
| MoCA total score                         | 22.67 (2.99)                          | 25.46 (2.83)                        | 21.48 (3.96)                        | 25.84 (2.57)                        | 25.29 (2.99)                         | $\eta^2 = 0.22$        | $F_{(4,507)} = 12.18, p < 0.001^c$ |
| ADLs                                     | 98.15 (4.59)                          | 87.50 (13.95)                       | 87.58 (15.65)                       | 96.56 (7.34)                        | 98.32 (5.42)                         | $\eta^2 = 0.19$        | $F_{(4,483)} = 27.92, p < 0.001^d$ |
| iADLs                                    | 85.28 (17.29)                         | 78.27 (21.67)                       | 60.99 (27.70)                       | 89.73 (14.06)                       | 91.13 (14.21)                        | $\eta^2 = 0.21$        | $F_{(4,474)} = 32.05, p < 0.001^e$ |
| <b>Vascular Risk Factors, n (% yes)</b>  |                                       |                                     |                                     |                                     |                                      |                        |                                    |
| Hypertension                             | 34 (64.2)                             | 10 (71.4)                           | 19 (70.4)                           | 47 (69.1)                           | 113 (83.7)                           | $V = 0.19$             | $\chi^2 (4) = 10.46, p = 0.036$    |
| Diabetes                                 | 25 (34.2)                             | 2 (10.5)                            | 8 (27.6)                            | 13 (19.1)                           | 34 (26.2)                            | $V = 0.14$             | $\chi^2 (4) = 6.69, p = 0.159$     |
| High Cholesterol                         | 58 (79.5)                             | 12 (63.2)                           | 27 (93.1)                           | 57 (83.8)                           | 121 (93.1)                           | $V = 0.24$             | $\chi^2 (4) = 17.94, p = 0.001$    |
| Smoking                                  | 67 (53.2)                             | 22 (55.0)                           | 28 (53.8)                           | 58 (41.4)                           | 84 (54.2)                            | $V = 0.11$             | $\chi^2 (4) = 6.37, p = 0.173$     |
| <b>Empathy</b>                           |                                       |                                     |                                     |                                     |                                      |                        |                                    |
|                                          | Mean (SD)                             | Mean (SD)                           | Mean (SD)                           | Mean (SD)                           | Mean (SD)                            |                        |                                    |
| IRIother-EC                              | 20.75 (5.58)                          | 20.88 (5.24)                        | 15.63 (7.21)                        | 20.61 (5.03)                        | 20.87 (5.44)                         | $\eta^2 = 0.07$        | $F_{(4,444)} = 8.83, p < 0.001^f$  |
| IRIother-PT                              | 15.22 (5.74)                          | 16.08 (5.82)                        | 10.38 (7.02)                        | 16.53 (6.07)                        | 15.78 (6.43)                         | $\eta^2 = 0.08$        | $F_{(4,477)} = 9.60, p < 0.001^f$  |
| IRIself-EC                               | 20.73 (4.00)                          | 21.30 (4.46)                        | 18.16 (5.44)                        | 20.28 (4.014)                       | 21.11 (4.21)                         | $\eta^2 = 0.04$        | $F_{(4,494)} = 4.97, p < 0.01^g$   |
| IRIself-PT                               | 18.62 (4.22)                          | 17.78 (4.69)                        | 16.18 (4.59)                        | 19.18 (4.42)                        | 18.40 (4.59)                         | $\eta^2 = 0.03$        | $F_{(4,494)} = 4.31, p = 0.002^h$  |
| <b>Regional WMH (<math>mm^3</math>)†</b> |                                       |                                     |                                     |                                     |                                      |                        |                                    |
|                                          | Adjusted Mean (SE)                    | Adjusted Mean (SE)                  | Adjusted Mean (SE)                  | Adjusted Mean (SE)                  | Adjusted Mean (SE)                   |                        |                                    |
| Frontal                                  | 1508.59 (296.13)                      | 1792.83 (535.23)                    | 1797.59 (455.46)                    | 1957.33 (277.74)                    | 3744.89 (263.99)                     | $\eta^2 = 0.08$        | $F_{(4,507)} = 10.37, p < 0.001^i$ |
| Parietal                                 | 1090.54 (335.25)                      | 1942.71 (605.93)                    | 1401.15 (515.62)                    | 1715.61 (314.43)                    | 3748.51 (298.86)                     | $\eta^2 = 0.09$        | $F_{(4,507)} = 13.19, p < 0.001^j$ |
| Occipital                                | 655.97 (74.45)                        | 750.73 (134.57)                     | 599.54 (114.51)                     | 759.25 (69.83)                      | 900.43 (66.37)                       | $\eta^2 = 0.02$        | $F_{(4,507)} = 2.19, p = 0.069$    |
| Temporal                                 | 525.24 (94.64)                        | 644.06 (171.05)                     | 599.86 (145.56)                     | 664.23 (88.76)                      | 1245.17 (84.37)                      | $\eta^2 = 0.07$        | $F_{(4,507)} = 9.57, p < 0.001^k$  |
| BGT                                      | 82.59 (24.51)                         | 69.62 (44.30)                       | 118.05 (37.69)                      | 181.31 (23.99)                      | 267.43 (21.85)                       | $\eta^2 = 0.09$        | $F_{(4,507)} = 12.55, p < 0.001^l$ |

AD, Alzheimer's disease; ADLs, Activities of Daily Living; ALS, Amyotrophic lateral sclerosis; BGT, Basal Ganglia/Thalamus; CVD, Cerebrovascular disease; EC, Empathic Concern; FTD, Frontotemporal disease; iADLs, Instrumental Activities of Daily Living; IRI, Interpersonal Reactivity Index; MCI, Mild cognitive impairment; MoCA, Montreal Cognitive Assessment; PD, Parkinson's disease; PT, Perspective Taking.

<sup>a</sup> ALS < AD/MCI ( $p < 0.001$ ), FTD ( $p = 0.002$ ), PD ( $p < 0.001$ ), and CVD ( $p < 0.001$ ); PD < AD/MCI ( $p = 0.007$ ).

<sup>b</sup> FTD < AD/MCI ( $p = 0.047$ ) and PD ( $p = 0.007$ ); ALS < PD ( $p = 0.014$ ).

<sup>c</sup> AD/MCI < ALS, PD, and CVD ( $p < 0.001$ ); FTD < ALS, PD and CVD ( $p < 0.001$ )

<sup>d</sup> ALS < AD/MCI, PD, and CVD ( $p < 0.001$ ); FTD < AD/MCI, PD, and CVD ( $p < 0.001$ )

<sup>e</sup> ALS < PD ( $p = 0.003$ ) and CVD ( $p < 0.001$ ); FTD < AD/MCI, ALS, PD, and CVD ( $p < 0.001$ ).

<sup>f</sup> FTD < AD/MCI, ALS, PD, and CVD ( $p < 0.001$ )

<sup>g</sup> FTD < AD/MCI ( $p = 0.004$ ), ALS ( $p = 0.006$ ), PD ( $p = 0.030$ ), and CVD ( $p < 0.001$ )

<sup>h</sup> FTD < AD/MCI ( $p = 0.014$ ), PD ( $p = 0.001$ ), and CVD ( $p = 0.026$ )

<sup>i</sup> CVD > AD/MCI and PD ( $p < 0.001$ ); CVD > ALS ( $p = 0.004$ )

<sup>j</sup> CVD > AD/MCI, ALS, and PD ( $p < 0.001$ ); CVD > FTD ( $p = 0.001$ )

<sup>k</sup> CVD > AD/MCI ( $p < 0.001$ ), ALS ( $p = 0.002$ ), FTD ( $p = 0.013$ ), and PD ( $p = 0.005$ )

<sup>l</sup> CVD > AD/MCI ( $p < 0.001$ ), ALS ( $p = 0.003$ ), and FTD ( $p = 0.023$ ); PD > AD/MCI ( $p < 0.001$ )

$\eta^2$  = Partial Eta Squared

V = Cramer's V

† adjusted for age

**Table 2** Study partner demographics.

|                                                          | AD/MCI<br>( $N = 126$ ) | ALS participants ( $N = 40$ ) | FTD participants ( $N = 52$ ) | PD participants ( $N = 140$ ) | CVD participants ( $N = 155$ ) |
|----------------------------------------------------------|-------------------------|-------------------------------|-------------------------------|-------------------------------|--------------------------------|
| Age (years) (Mean (SD))                                  | 62.92 (14.54)           | 56.73 (12.29)                 | 60.75 (11.33)                 | 62.43 (10.71)                 | 62.97 (12.10)                  |
| Sex (F:M) (% F)                                          | 86:40 (68.3)            | 26:14 (65.0)                  | 40:12 (76.9%)                 | 115:25 (82.1)                 | 118:37 (76.1)                  |
| Live together (Yes: No) (% Yes)                          | 95:31 (75.4)            | 33:7 (82.5)                   | 40:12 (76.9)                  | 122:18 (87.1)                 | 124:31 (80)                    |
| Time spent with participant (hours per week) (Mean (SD)) | 132.54 (65.04)          | 142.70 (56.58)                | 130.83 (68.58)                | 147.12 (54.59)                | 138.34 (60.89)                 |
| <b>Relationship to participant</b>                       |                         |                               |                               |                               |                                |
| Domestic Partner $n$ (%)                                 | 83 (65.9)               | 29 (72.5)                     | 40 (76.9)                     | 114 (81.4)                    | 115 (74.2)                     |
| Others $n$ (%)                                           | 43 (34.1)               | 11 (27.5)                     | 12 (23.1)                     | 26 (18.6)                     | 40 (25.8)                      |

AD, Alzheimer's Disease; ALS, Amyotrophic lateral sclerosis; CVD, Cerebrovascular disease; FTD, Frontotemporal disease; MCI, Mild Cognitive Impairment; PD, Parkinson's disease.

**Table 3** Participant sex difference on empathy controlled for study partners' sex and age.

|             | <b>Males (<i>N</i> = 287)<br/>Adjusted Mean<br/>(SE)</b> | <b>Females (<i>N</i> = 143)<br/>Adjusted Mean<br/>(SE)</b> | <b>Effect size <math>\eta^2</math></b> | <b>F, <i>p</i>-value</b>         |
|-------------|----------------------------------------------------------|------------------------------------------------------------|----------------------------------------|----------------------------------|
| IRIother-EC | 19.52 (0.47)                                             | 21.86 (0.48)                                               | $\eta^2 = 0.025$                       | $F_{(1,426)} = 10.78, p = 0.001$ |
| IRIother-PT | 15.34 (0.53)                                             | 16.68 (0.54)                                               | $\eta^2 = 0.006$                       | $F_{(1,426)} = 2.77, p = 0.097$  |
| IRIself-EC  | 20.29 (0.35)                                             | 21.88 (0.36)                                               | $\eta^2 = 0.021$                       | $F_{(1,426)} = 9.13, p = 0.003$  |
| IRIself-PT  | 18.01 (0.37)                                             | 19.35 (0.38)                                               | $\eta^2 = 0.013$                       | $F_{(1,426)} = 5.58, p = 0.019$  |

EC, Empathic Concern; IRI, Interpersonal Reactivity Index; PT, Perspective Taking.

$\eta^2$  = Partial Eta Squared

**Table 4** Group level cortical thickness analysis showing significant clusters adjusted for age and corrected for multiple comparisons.

|              | Anatomical Regions          | Max<br>log <sub>10</sub> of cluster<br>t-value | Surface area<br>(mm <sup>2</sup> ) | Talairach<br>(MNI305)<br>(x,y,z) | HiCWP - HiCWP | <i>p</i> |
|--------------|-----------------------------|------------------------------------------------|------------------------------------|----------------------------------|---------------|----------|
| CVD < ALS    | Left superior parietal      | -3.929                                         | 627.41                             | -14.6, -92.3, 20.2               | 0.004 – 0.008 | 0.006    |
| CVD < PD     | Left insula                 | -4.629                                         | 1116.22                            | -34.1, 2.2, 14.1                 | 0.000 – 0.001 | < 0.001  |
|              | Left postcentral            | -5.747                                         | 576.12                             | -57.5, -10.4, 12.2               | 0.008 – 0.013 | 0.010    |
| FTD < AD/MCI | Left lateral orbitofrontal  | 6.012                                          | 1490.10                            | -18.9, 25.0, -19.8               | 0.000 – 0.001 | < 0.001  |
|              | Left pars-opercularis       | 3.580                                          | 548.78                             | -45.5, 20.6, 8.1                 | 0.009 – 0.015 | 0.012    |
|              | Right superior temporal     | 4.203                                          | 3510.14                            | 43.0, 16.0, -30.4                | 0.000 – 0.001 | < 0.001  |
|              | Right lateral orbitofrontal | 4.511                                          | 738.90                             | 19.9, 24.3, -16.6                | 0.001 – 0.003 | 0.002    |
| FTD < ALS    | Left lateral orbitofrontal  | -4.444                                         | 767.75                             | -18.2, 24.6, -21.0               | 0.000 – 0.002 | < 0.001  |
|              | Left pars-opercularis       | -4.899                                         | 586.71                             | -51.1, 18.8, 12.6                | 0.006 – 0.010 | 0.008    |
|              | Right middle temporal       | -4.732                                         | 2695.52                            | 51.6, -15.8, -18.9               | 0.000 – 0.001 | < 0.001  |
| FTD < PD     | Right inferior temporal     | 5.296                                          | 1140.77                            | 46.4, -13.6, -35.9               | 0.000 – 0.001 | < 0.001  |
|              | Left inferior temporal      | 3.540                                          | 429.04                             | -46.7, -7.3, -31.8               | 0.043 – 0.054 | 0.049    |
|              | Right superior temporal     | 3.793                                          | 1024.10                            | 47.1, 14.6, -25.6                | 0.000 – 0.001 | < 0.001  |
|              | Right superior frontal      | 4.412                                          | 1082.22                            | 21.2, 43.4, 31.6                 | 0.000 – 0.001 | < 0.001  |
|              | Left pars-opercularis       | 3.507                                          | 545.46                             | -45.9, 19.2, 9.6                 | 0.008 – 0.012 | 0.009    |
|              | Right lateral orbitofrontal | 6.462                                          | 1146.99                            | 35.7, 31.7, -12.0                | 0.000 – 0.001 | < 0.001  |
|              | Left lateral orbitofrontal  | 4.124                                          | 1832.94                            | -28.0, 21.6, -21.1               | 0.000 – 0.001 | < 0.001  |
| FTD < CVD    | Right inferior temporal     | 3.206                                          | 595.32                             | 45.5, -12.5, -36.3               | 0.004 – 0.008 | 0.006    |

bioRxiv preprint doi: <https://doi.org/10.1101/2021.03.03.429018>; this version posted March 3, 2021. The copyright holder for this preprint (which was not certified by peer review) is the author/funder, who has granted bioRxiv a license to display the preprint in perpetuity. It is made available under aCC-BY-NC-ND 4.0 International license.

|                            |       |         |                    |               |         |
|----------------------------|-------|---------|--------------------|---------------|---------|
| Left lateral orbitofrontal | 5.803 | 1226.20 | -18.6, 24.5, -20.3 | 0.000 – 0.001 | < 0.001 |
|----------------------------|-------|---------|--------------------|---------------|---------|

AD, Alzheimer’s disease; ALS, Amyotrophic lateral sclerosis; CVD, Cerebrovascular disease; FTD, Frontotemporal disease; iADLs, Instrumental Activities of Daily Living; LowCWP = Lower clusterwise p-value 90% confidence interval; MCI, Mild cognitive impairment; PD, Parkinson’s disease; HiCWP = Upper clusterwise p-value 90% confidence.

**Table 5A** Demographics and summary for all elastic net and PLSc analyses.

| <b>N = 429</b> | <b>Female</b> | <b>Male</b> |
|----------------|---------------|-------------|
| <b>ADMCI</b>   | 46            | 56          |
| <b>ALS</b>     | 13            | 20          |
| <b>FTD</b>     | 13            | 30          |
| <b>PD</b>      | 29            | 95          |
| <b>CVD</b>     | 42            | 85          |

Mean age = 68.42, Median age = 68.78, Min/Max age = 40.12/87.80. Mean MoCA = 24.44, Median MoCA = 25, Min/Max MoCA = 13/30. PLSc = partial least squares correlation. AD, Alzheimer’s Disease; ALS, Amyotrophic lateral sclerosis; CVD, Cerebrovascular disease; FTD, Frontotemporal disease; MCI, Mild Cognitive Impairment; PD, Parkinson’s disease.

## Elastic net models

**Table 5B** IRIOther-PT analyses.

|                                 | 1000 (91/500) | 0.6607 (31/500) | 0.6026 (27/500) | 0.6310 (25/500) | 0.5495 (25/500) | 0.6918 (24/500) |
|---------------------------------|---------------|-----------------|-----------------|-----------------|-----------------|-----------------|
| (Intercept)                     | 15.54312      | 9.50992         | 8.01206         | 8.80099         | 6.52513         | 10.22975        |
| Sex(female)                     | 0             | 0.11757         | 0.22747         | 0.17604         | 0.32434         | 0.05642         |
| MoCA TOTAL                      | 0             | 0.13553         | 0.15012         | 0.14313         | 0.16322         | 0.12759         |
| LH SUPERIORFRONTAL THICKNESS    | 0             | 0.33429         | 0.48336         | 0.42414         | 0.59992         | 0.23952         |
| RH PARS-TRIANGULARIS THICKNESS  | 0             | 0.82789         | 1.04049         | 0.94463         | 1.22189         | 0.70586         |
| RH POSTERIORCINGULATE THICKNESS | 0             | 0               | 0.11613         | 0.00976         | 0.31157         | 0               |

Row names indicate variables selected, column names indicate the lambda parameter and how many times out of 500 repeats that the lambda parameter had the lowest mean square error for our repeated cross-validation. Values in the cells are coefficients from the full data sample for the corresponding selected variables (rows) under the penalisation parameter (columns). Lambda parameters are ordered by how often they were selected over the 500 repeats. LH = Left Hemisphere; RH = Right Hemisphere; MoCA = Montreal Cognitive Assessment.

**Table 5C** IRIOther-EC analyses.

|                                 | 1000 (69/500) | 0.4365 (31/500) | 0.4169 (31/500) | 0.4571 (28/500) | 0.5012 (26/500) | 0.4786 (26/500) |
|---------------------------------|---------------|-----------------|-----------------|-----------------|-----------------|-----------------|
| (Intercept)                     | 20.26807      | 11.73125        | 10.74835        | 12.6554         | 14.50445        | 13.55864        |
| AGE                             | 0             | 0.02216         | 0.0261          | 0.0182          | 0.0099          | 0.01414         |
| Sex(female)                     | 0             | 1.13391         | 1.17471         | 1.08879         | 0.98895         | 1.04002         |
| MoCA TOTAL                      | 0             | 0.05839         | 0.06547         | 0.05079         | 0.03424         | 0.0427          |
| RH PARS-TRIANGULARIS THICKNESS  | 0             | 1.27989         | 1.36183         | 1.18387         | 0.96422         | 1.07657         |
| RH POSTERIORCINGULATE THICKNESS | 0             | 0.03707         | 0.13201         | 0               | 0               | 0               |
| RH FRONTALPOLE THICKNESS        | 0             | 0.90209         | 0.95342         | 0.84114         | 0.70147         | 0.77291         |

Row names indicate variables selected, column names indicate the lambda parameter and how many times out of 500 repeats that the lambda parameter had the lowest mean square error for our repeated cross-validation. Values in the cells are coefficients from the full data sample for the corresponding selected variables (rows) under the penalisation parameter (columns). Lambda parameters are ordered by how often they were selected over the 500 repeats. LH = Left Hemisphere; RH = Right Hemisphere; MoCA = Montreal Cognitive Assessment.



**Table 5D** IRIselF-PT analyses.

|                                  | 1000 (109/500) | 0.3162 (33/500) | 0.2754 (31/500) | 0.3020 (26/500) | 0.2884 (26/500) | 0.3467 (24/500) |
|----------------------------------|----------------|-----------------|-----------------|-----------------|-----------------|-----------------|
| (Intercept)                      | 18.39627       | 16.46224        | 16.29907        | 16.38913        | 16.36417        | 16.93565        |
| AGE                              | 0              | 0.01099         | 0.01452         | 0.01243         | 0.01358         | 0.00702         |
| Sex(female)                      | 0              | 0.65553         | 0.70771         | 0.67702         | 0.69545         | 0.61189         |
| LH PARACENTRAL THICKNESS         | 0              | 0               | -0.33498        | -0.09316        | -0.21798        | 0               |
| RH INFERIORETEMPORAL THICKNESS   | 0              | 0               | -0.18986        | 0               | -0.05152        | 0               |
| RH ISTHMUSCINGULATE THICKNESS    | 0              | 0               | 0.02428         | 0               | 0               | 0               |
| RH LATERAL OCCIPITAL THICKNESS   | 0              | -2.20757        | -2.7023         | -2.42091        | -2.58678        | -1.69072        |
| RH PARS-TRIANGULARIS THICKNESS   | 0              | 0.44849         | 0.80484         | 0.55037         | 0.66784         | 0.24846         |
| RH TRANSVERSE TEMPORAL THICKNESS | 0              | 0.74685         | 1.1163          | 0.87437         | 1.00121         | 0.50585         |
| RH INSULA THICKNESS              | 0              | 1.1695          | 1.4996          | 1.26131         | 1.36701         | 0.97993         |
| RP WMH                           | 0              | 0.0296          | 0.08149         | 0.04724         | 0.06465         | 0               |

Row names indicate variables selected, column names indicate the lambda parameter and how many times out of 500 repeats that the lambda parameter had the lowest mean square error for our repeated cross-validation. Values in the cells are coefficients from the full data sample for the corresponding selected variables (rows) under the penalisation parameter (columns). Lambda parameters are ordered by how often they were selected over the 500 repeats. LH = Left Hemisphere; RH = Right Hemisphere.

**Table 5E** IRIsel-EC analyses.

|                                             | 0.3020<br>(36/500) | 0.2884<br>(32/500) | 0.2754<br>(32/500) | 0.2630<br>(32/500) | 0.2512<br>(31/500) | 0.4169<br>(28/500) | 0.3311<br>(28/500) | 0.3981<br>(26/500) | 0.3631<br>(26/500) | 0.4365<br>(26/500) |
|---------------------------------------------|--------------------|--------------------|--------------------|--------------------|--------------------|--------------------|--------------------|--------------------|--------------------|--------------------|
| (Intercept)                                 | 17.73324           | 17.81793           | 17.94758           | 18.17251           | 18.35472           | 17.9356            | 17.77067           | 17.65269           | 17.8118            | 18.23191           |
| Sex(female)                                 | 1.59032            | 1.62376            | 1.65634            | 1.68451            | 1.71169            | 1.33771            | 1.52469            | 1.37592            | 1.45278            | 1.29768            |
| MoCA TOTAL                                  | 0.04404            | 0.0486             | 0.05302            | 0.05755            | 0.06191            | 0.00731            | 0.0346             | 0.0124             | 0.02425            | 0.00198            |
| LH<br>CAUDALANTERIORCING<br>ULATE THICKNESS | 0                  | 0                  | 0                  | 0                  | 0.02341            | 0                  | 0                  | 0                  | 0                  | 0                  |
| LH INSULA THICKNESS                         | 0                  | 0                  | -0.00856           | -0.09878           | -0.18978           | 0                  | 0                  | 0                  | 0                  | 0                  |
| RH ISTHMUSCINGULATE<br>THICKNESS            | 1.33537            | 1.38899            | 1.44256            | 1.50323            | 1.55698            | 0.90335            | 1.22777            | 0.96921            | 1.10975            | 0.8344             |
| RH LATERAL OCCIPITAL<br>THICKNESS           | -1.55105           | -1.77415           | -1.98059           | -2.16345           | -2.33835           | 0                  | -1.04585           | 0                  | -0.49206           | 0                  |
| RH PARS-OPERCULARIS<br>THICKNESS            | 0.67032            | 0.79551            | 0.91791            | 1.05679            | 1.19051            | 0                  | 0.40536            | 0                  | 0.11486            | 0                  |
| RO WMH                                      | 0                  | 0.01781            | 0.04137            | 0.06229            | 0.08288            | 0                  | 0                  | 0                  | 0                  | 0                  |

Row names indicate variables selected, column names indicate the lambda parameter and how many times out of 500 repeats that the lambda parameter had the lowest mean square error for our repeated cross-validation. Values in the cells are coefficients from the full data sample for the corresponding selected variables (rows) under the penalisation parameter (columns). Lambda parameters are ordered by how often they were selected over the 500 repeats. LH = Left Hemisphere; RH = Right Hemisphere; MoCA = Montreal Cognitive Assessment.

## Partial Least Squares Correlation (PLSc)

**Table 6A** Bootstrap ratios for the empathy subscale scores.

|             | Component 1 |
|-------------|-------------|
| IRIother-PT | -3.66       |
| IRIself-PT  | -1.36       |
| IRIother-EC | -3.00       |
| IRIself-EC  | -2.10       |

EC, Empathic Concern; IRI, Interpersonal Reactivity Index; PT, Perspective Taking.

**Table 6B** Bootstrap ratios for all other variables (only those above magnitude of 2 are shown).

|                                       | Component 1 |
|---------------------------------------|-------------|
| Sex(female)                           | -4.92       |
| MoCATOTAL                             | -3.1        |
| LH PARS-TRIANGULARIS THICKNESS        | -2.31       |
| LH ROSTRALANTERIORCINGULATE THICKNESS | -2.23       |
| LH SUPERIORFRONTAL THICKNESS          | -2.32       |
| RH ISTHMUSCINGULATE THICKNESS         | -2.56       |
| RH PARS-OPERCULARIS THICKNESS         | -2.03       |
| RH PARS-TRIANGULARIS THICKNESS        | -3.08       |
| RH POSTERIORCINGULATE THICKNESS       | -2.98       |
| RH ROSTRALMIDDLEFRONTAL THICKNESS     | -2.3        |
| RH SUPERIORFRONTAL THICKNESS          | -2.07       |
| RH TRANSVERSETEMPORAL THICKNESS       | -2.27       |
| RH INSULA THICKNESS                   | -2.19       |

LH = Left Hemisphere; RH = Right Hemisphere; MoCA = Montreal Cognitive Assessment.

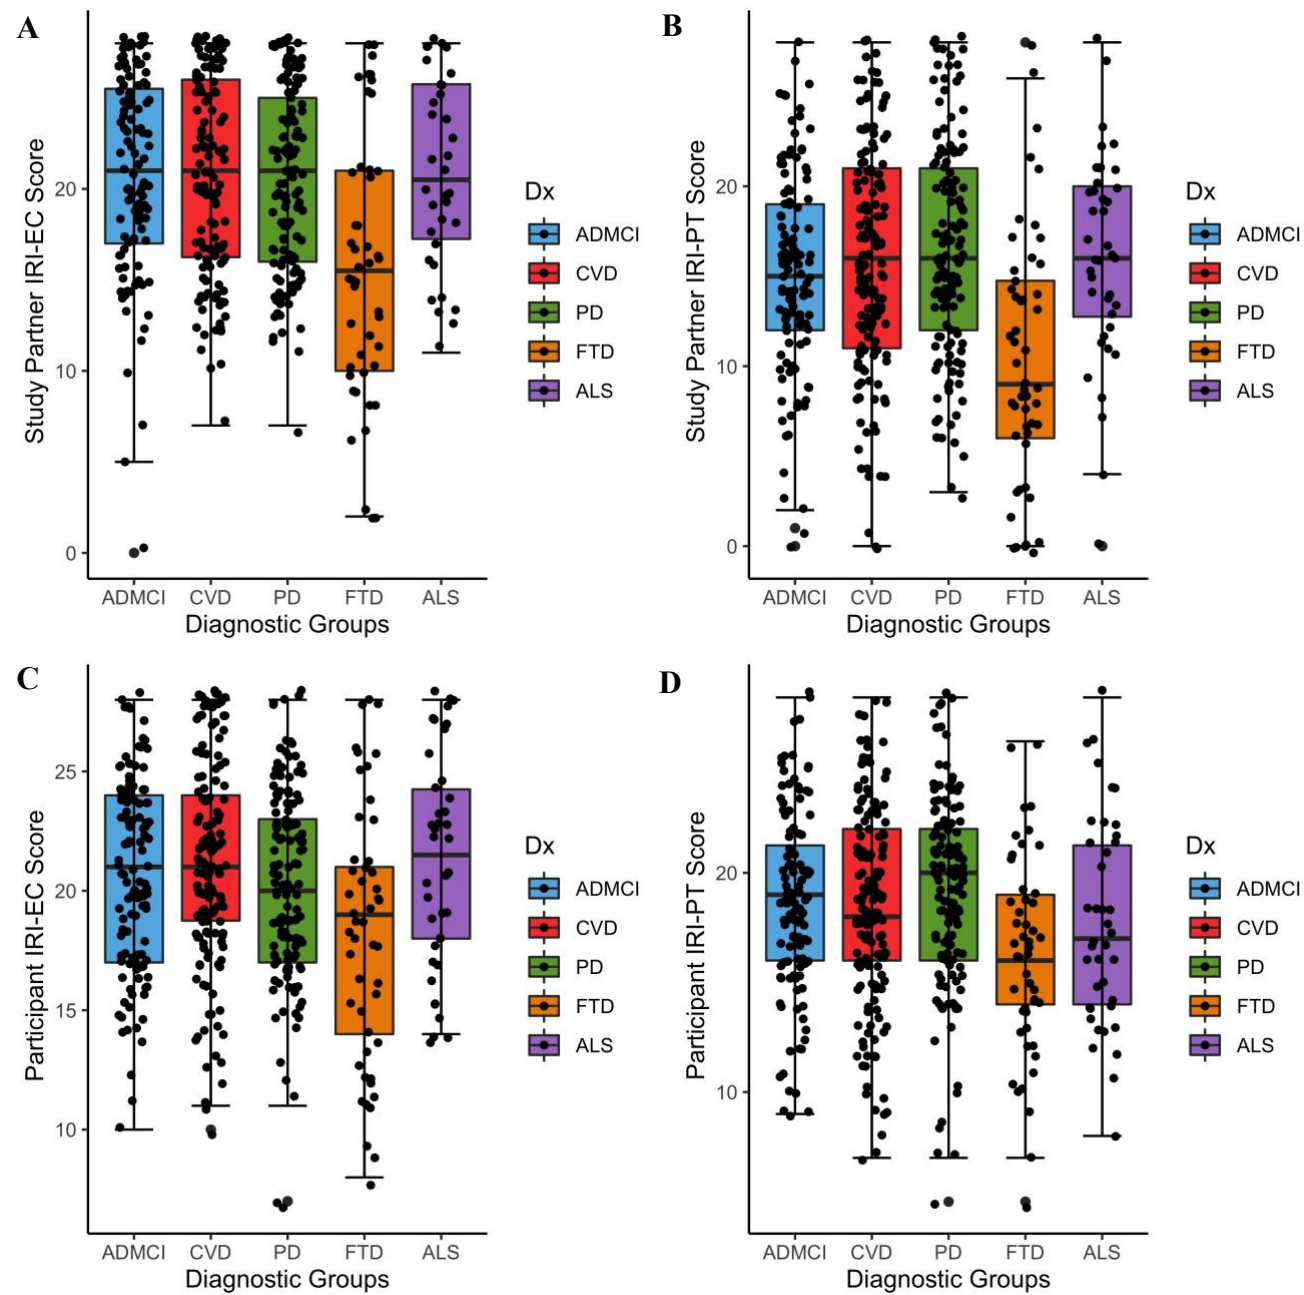

**Figure. 1** Boxplots showing empathy scores classified by groups. (A) IRI<sub>other</sub>-EC; (B) IRI<sub>other</sub>-PT; (C) IRI<sub>self</sub>-EC; (D) IRI<sub>self</sub>-PT *Notes:* AD, Alzheimer’s Disease; ALS, Amyotrophic lateral sclerosis; CVD, Cerebrovascular disease; EC, Emotional Concern; FTD, Frontotemporal disease; IRI, Interpersonal Reactivity Index; MCI, Mild Cognitive Impairment; PD, Parkinson’s disease; PT, Perspective Taking.

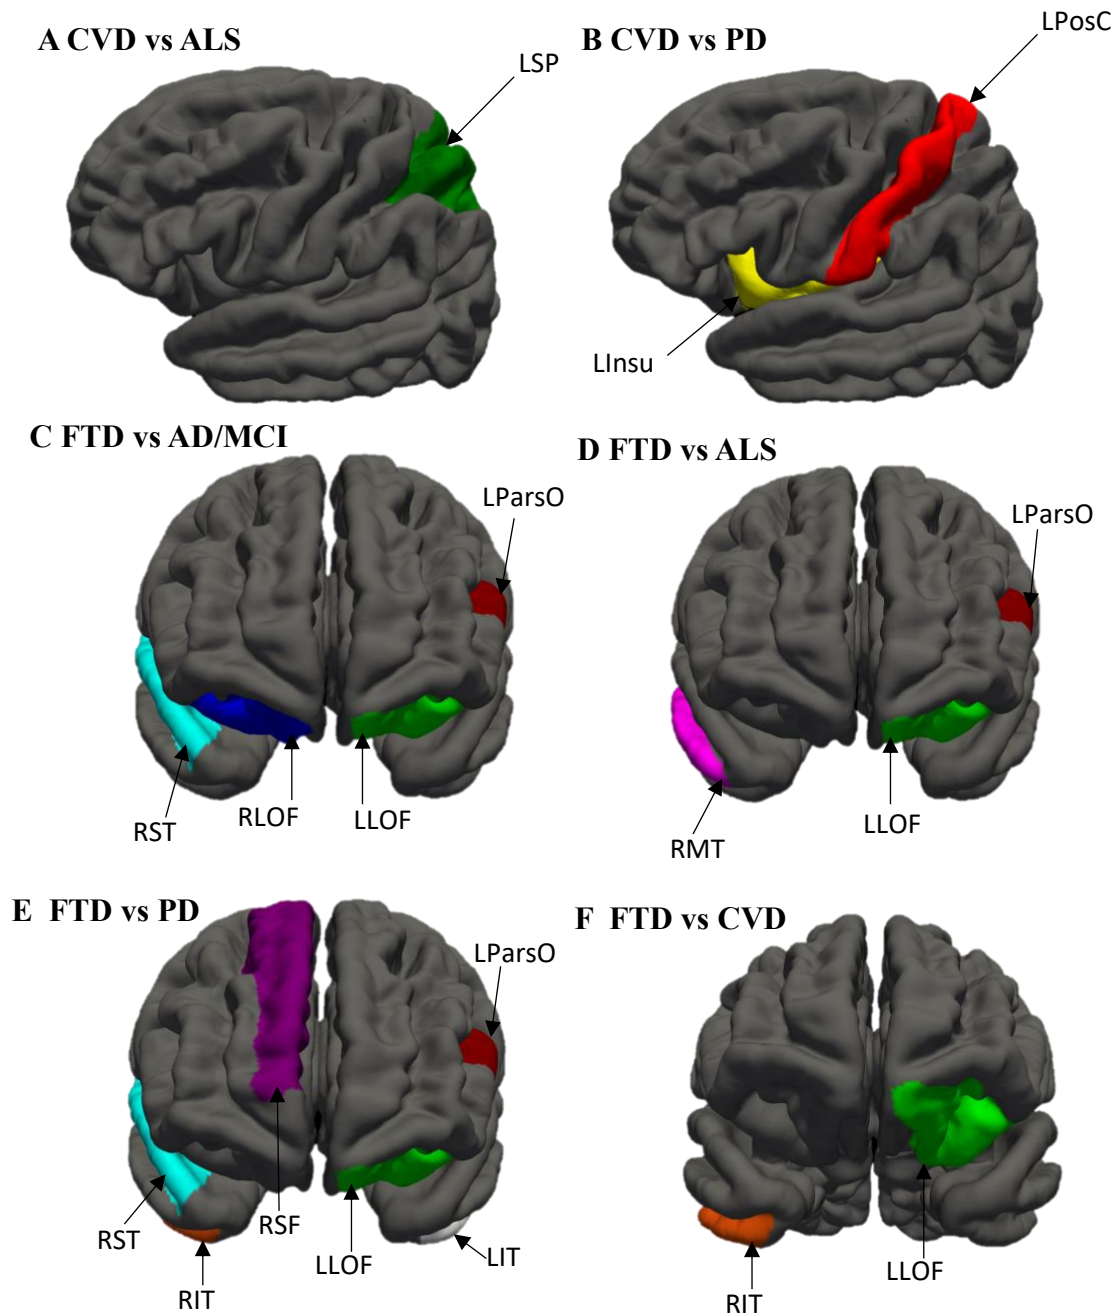

**Figure. 2** Cortical thickness analysis showing regions with cortical thinning in (A) CVD vs ALS; (B) CVD vs PD; (C) FTD vs AD/MCI; (D) FTD vs ALS; (E) FTD vs PD, and (F) FTD vs CVD. *Notes:* AD, Alzheimer's Disease; ALS, Amyotrophic lateral sclerosis; CVD, Cerebrovascular disease; FTD, Frontotemporal disease; MCI, Mild Cognitive Impairment; LLOF, Left lateral orbitofrontal; LParsO, Left pars-opercularis; LPosC, Left postcentral; LSP, Left superior parietal; LInsu, Left Insula; LIT, Left inferior temporal; RLOF, Right lateral orbitofrontal; RST, Right superior temporal; RMT, Right middle temporal; RSF, Right superior frontal; RIT, Right inferior temporal; PD, Parkinson's disease.

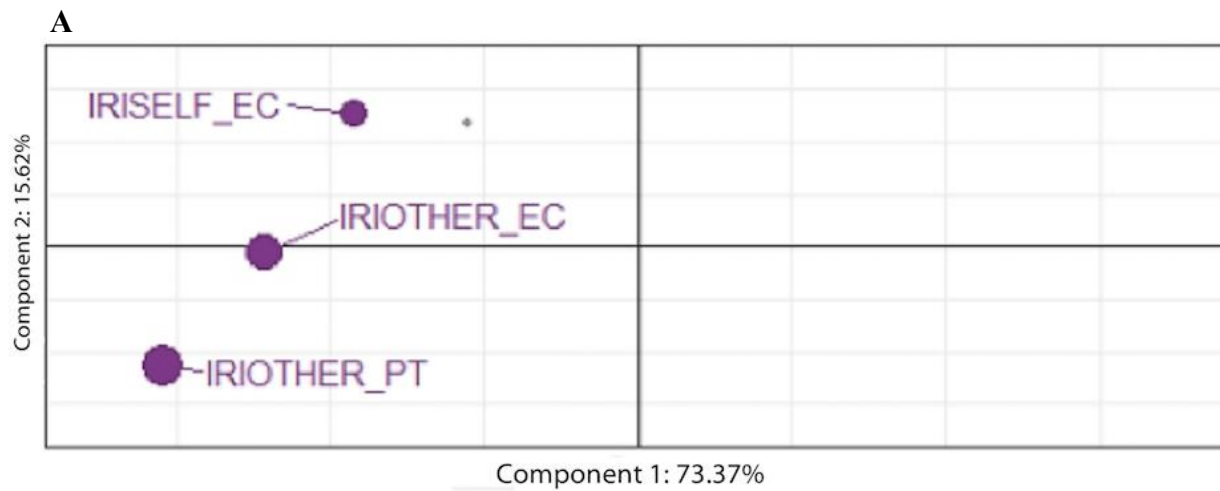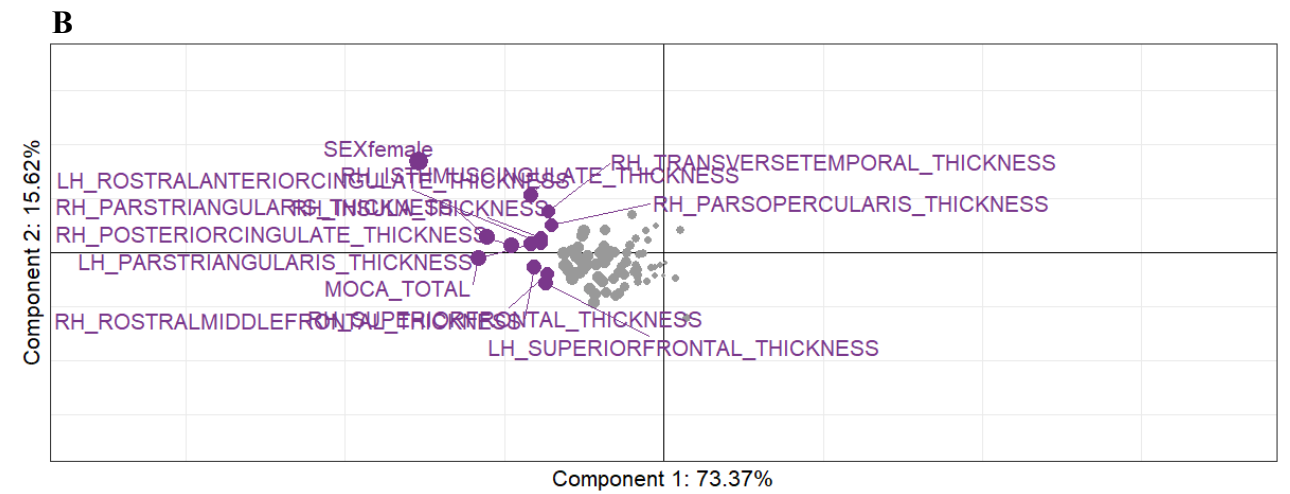

**Figure. 3** Partial Least Squares Correlation Diagram. (A) component scores for IRI subscales; (B) component score for stable contributors. The values for all IRI subscales appear in the same direction where IRIOther-PT shows the highest amount of variance on Component 1. IRISelf-PT was not a stable contributor to Component 1. The stable contributors go in the same direction as the IRI scores, indicating a positive correlation between them. EC, Empathic Concern; IRI, Interpersonal Reactivity Index; PT, Perspective Taking.

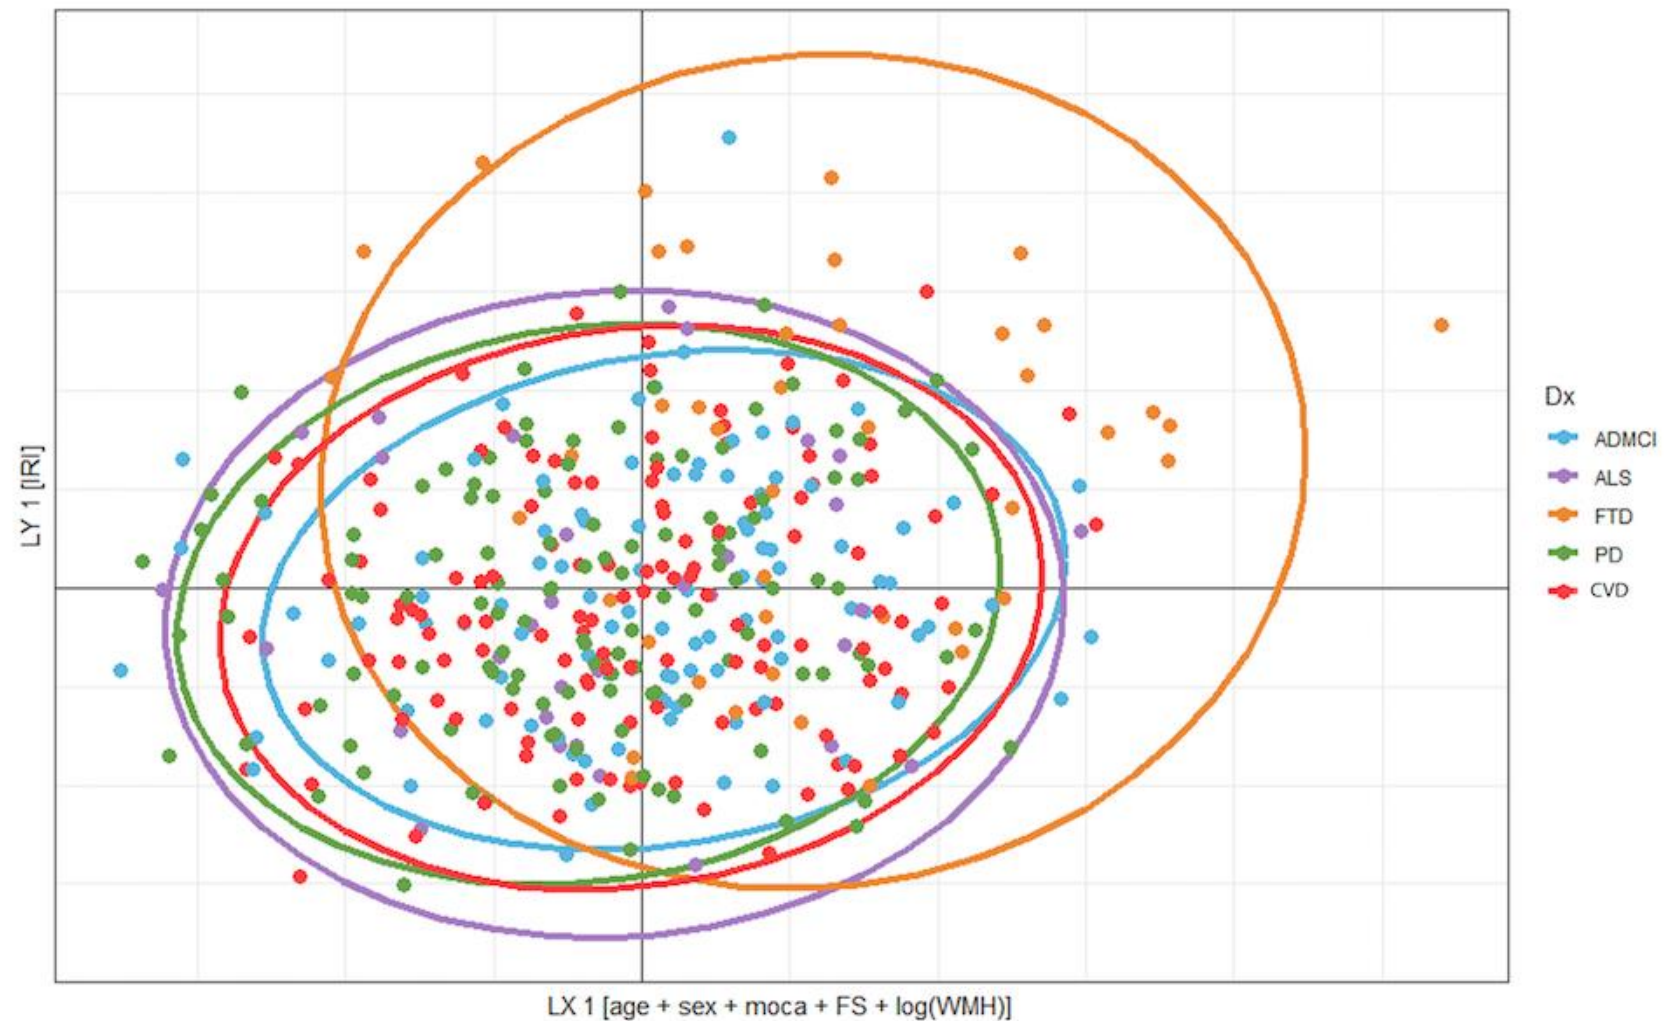

**Figure. 4** Relationship between diagnosis, IRI, and contributors. IRI, Interpersonal Reactivity Index; FS, FreeSurfer cortical thickness (68 regions); WMH, lobar white matter hyperintensities (10 regions); MoCA = Montreal Cognitive Assessment; AD, Alzheimer’s Disease; ALS, Amyotrophic lateral sclerosis; CVD, Cerebrovascular disease; FTD, Frontotemporal disease; MCI, Mild Cognitive Impairment; PD, Parkinson’s disease.
